# Supplementary material for: BP23C7: high-yield synthesis and application in constructing [3]rotaxanes and responsive pseudo[2]rotaxanes
Source: Royal Society of Chemistry journal article supplement (doi:10.1039/d3ob02094k), 2024-01-01

## **BP23C7: high-yield synthesis and application in constructing [3]rotaxanes and responsive pseudo[2]rotaxanes**

Manisha Prakashni<sup>a</sup> and Suvankar Dasgupta<sup>a\*</sup>

Department of Chemistry, National Institute of Technology Patna, Patna – 800005, India

### **Electronic Supplementary Information**

#### **Table of Contents**

|                                                                                                    |     |
|----------------------------------------------------------------------------------------------------|-----|
| 1. Optimization table for <b>BP23C7</b> synthesis.....                                             | S2  |
| 2. Nominal ESI-MS of a 1:1 mixture of <b>DBA·PF<sub>6</sub></b> & <b>BP23C7</b> .....              | S3  |
| 3. <sup>1</sup> H NMR spectrum of a 1:1 mixture of <b>DBA·PF<sub>6</sub></b> & <b>BP23C7</b> ..... | S4  |
| 4. Nominal ESI-MS of a 1:1 mixture of <b>1-H·PF<sub>6</sub></b> & <b>BP23C7</b> .....              | S5  |
| 5. <sup>1</sup> H NMR spectrum of a 1:1 mixture of <b>1-H·PF<sub>6</sub></b> & <b>BP23C7</b> ..... | S6  |
| 6. Optical data of the mixture of <b>1-H·PF<sub>6</sub></b> & <b>BP23C7</b> .....                  | S7  |
| 7. Nominal ESI-MS of a 1:1 mixture of <b>2-H·PF<sub>6</sub></b> & <b>BP23C7</b> .....              | S8  |
| 8. <sup>1</sup> H NMR spectrum of a 1:1 mixture of <b>2-H·PF<sub>6</sub></b> & <b>BP23C7</b> ..... | S9  |
| 9. Optical data of the mixture of <b>2-H·PF<sub>6</sub></b> & <b>BP23C7</b> .....                  | S10 |
| 10. Fluorescence titration of <b>BP23C7</b> with <b>1-H·PF<sub>6</sub></b> & <b>1-H·Cl</b> .....   | S11 |
| 11. Fluorescence titration of <b>BP23C7</b> with <b>2-H·PF<sub>6</sub></b> .....                   | S12 |
| 12. 2D NOESY NMR spectrum of the [3]Rotaxane <b>10-H<sub>2</sub>·2PF<sub>6</sub></b> .....         | S13 |
| 13. HR ESI-MS spectrum of the [3]Rotaxane <b>10-H<sub>2</sub>·2PF<sub>6</sub></b> .....            | S14 |
| 14. 2D NOESY NMR spectrum of the [3]Rotaxane <b>11-H<sub>2</sub>·2PF<sub>6</sub></b> .....         | S15 |
| 15. HR ESI-MS spectrum of the [3]Rotaxane <b>11-H<sub>2</sub>·2PF<sub>6</sub></b> .....            | S16 |
| 16. <sup>1</sup> H NMR & <sup>13</sup> C NMR spectra of all synthesized compounds.....             | S17 |

## 1. Optimization table for BP23C7 synthesis

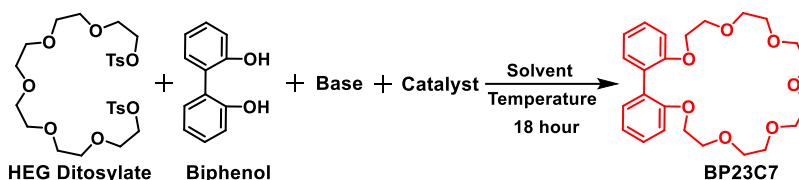

| Entry | Solvent <sup>b</sup> | Base (equiv.)                       | Catalyst (equiv.)       | Temperature | Yield (%) <sup>c</sup> |
|-------|----------------------|-------------------------------------|-------------------------|-------------|------------------------|
| 1     | THF                  | NaH (3)                             | KPF <sub>6</sub> (0.25) | Room temp.  | 44                     |
| 2     | THF                  | NaH (6)                             | KPF <sub>6</sub> (0.25) | Room temp.  | 25                     |
| 3     | DMF                  | NaH (3)                             | KPF <sub>6</sub> (0.25) | Room temp.  | 23                     |
| 4     | DMF                  | NaH (6)                             | KPF <sub>6</sub> (0.25) | Room temp.  | 15                     |
| 5     | THF                  | NaH (3)                             | KPF <sub>6</sub> (0.25) | 80°C        | 83                     |
| 6     | THF                  | NaH (3)                             | KI (0.25)               | 80°C        | 77                     |
| 7     | THF                  | K <sub>2</sub> CO <sub>3</sub> (3)  | -                       | 80°C        | 66                     |
| 8     | THF                  | KO <sup>t</sup> Bu (3)              | -                       | 80°C        | 71                     |
| 9     | THF                  | Cs <sub>2</sub> CO <sub>3</sub> (3) | -                       | 80°C        | 71                     |
| 10    | DMF                  | NaH (3)                             | KPF <sub>6</sub> (0.25) | 80°C        | 51                     |
| 11    | DMF                  | Cs <sub>2</sub> CO <sub>3</sub> (3) | -                       | 80°C        | 64                     |
| 12    | ACN                  | Cs <sub>2</sub> CO <sub>3</sub> (3) | -                       | 80°C        | 86                     |

<sup>a</sup>100 mg scale of HEG ditosylate has been used throughout. <sup>b</sup>THF = Tetrahydrofuran, DMF = N,N'-Dimethylformamide and ACN = Acetonitrile. <sup>c</sup>Isolated yield.

**Table S1.** Optimization reaction condition for **BP23C7** synthesis. Heating condition afforded better yields. Three equivalents of base worked better than six equivalents of base. Templates such as KPF<sub>6</sub> and KI are effective, and bases comprising of alkali metal ions performed additional role of templating. Cs<sub>2</sub>CO<sub>3</sub> in acetonitrile medium at 80°C afforded the highest yield (86%, entry 12).

## 2. Nominal ESI-MS of a 1:1 mixture of DBA•PF<sub>6</sub> & BP23C7

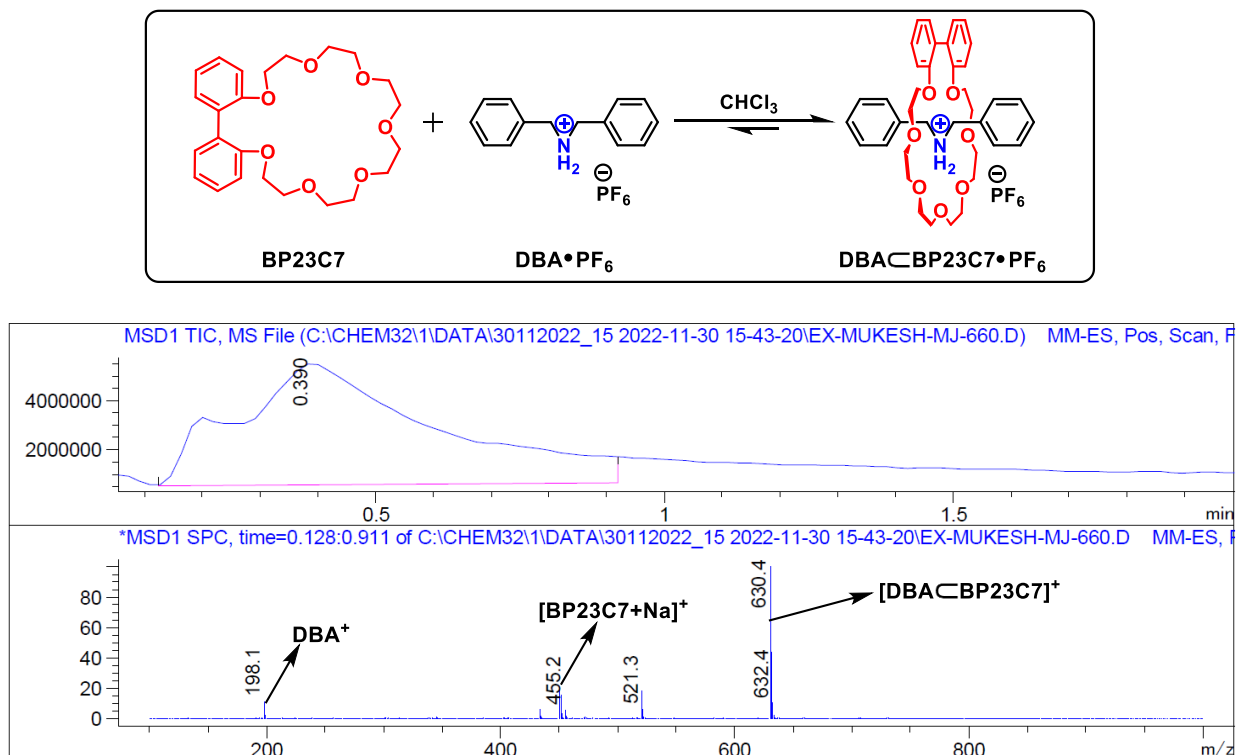

**Figure S1.** ESI mass spectrum of the equimolar mixture of **DBA•PF<sub>6</sub>** & **BP23C7** displayed base peak at  $m/z = 630.4$   $[M-PF_6]^+$ , where “M” corresponds to the pseudo[2]rotaxane species **DBA⊂BP23C7•PF<sub>6</sub>**.

### 3. $^1\text{H}$ NMR spectrum of a 1:1 mixture of $\text{DBA}\cdot\text{PF}_6$ & $\text{BP23C7}$

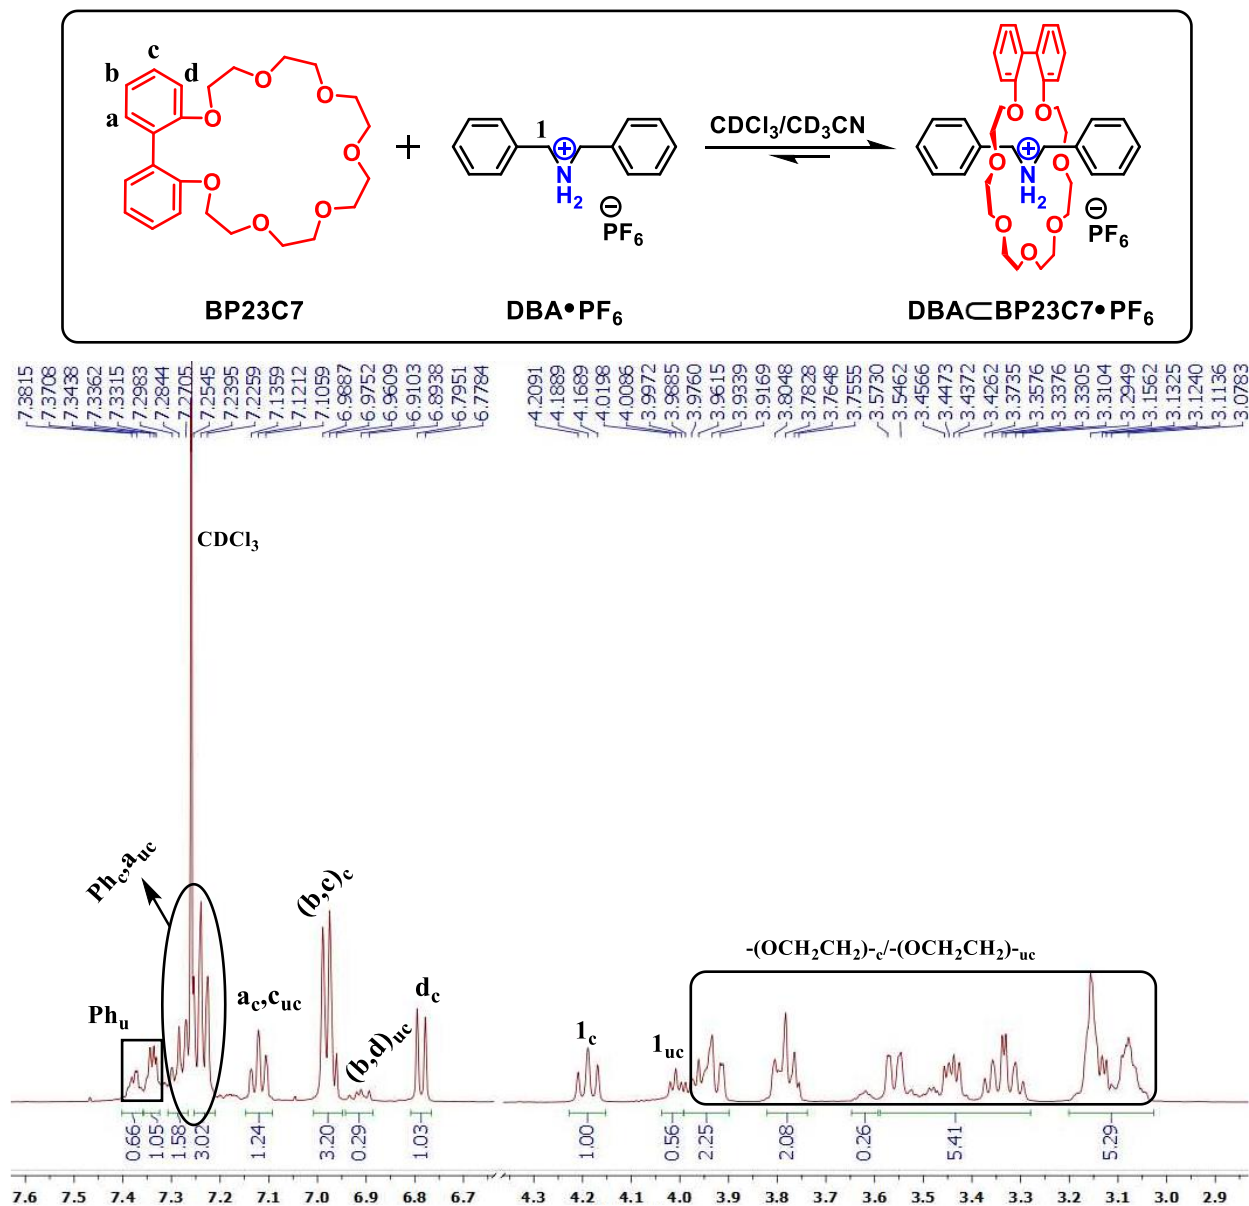

**Figure S2.**  $^1\text{H}$  NMR spectrum (500 MHz,  $\text{CDCl}_3/\text{CD}_3\text{CN} = 11:1$ ) of a 5mM equimolar mixture of  $\text{DBA}\cdot\text{PF}_6$  &  $\text{BP23C7}$ .  $K_a$  value calculated from integrations of the complexed and the uncomplexed peaks “1” of  $\text{DBA}\cdot\text{PF}_6$  is  $[(1.00/1.56) \times 5.00 \times 10^{-3}] / [(1 - 1.00/1.56) \times 5.00 \times 10^{-3}]^2 = 1.00 \times 10^3 \text{ M}^{-1}$ .

#### 4. Nominal ESI-MS of a 1:1 mixture of 1-H•PF<sub>6</sub> & BP23C7

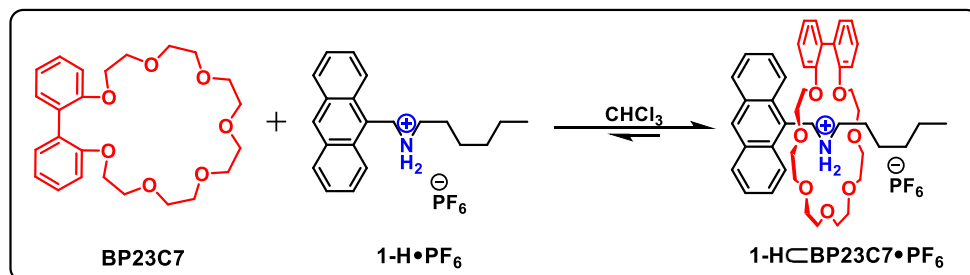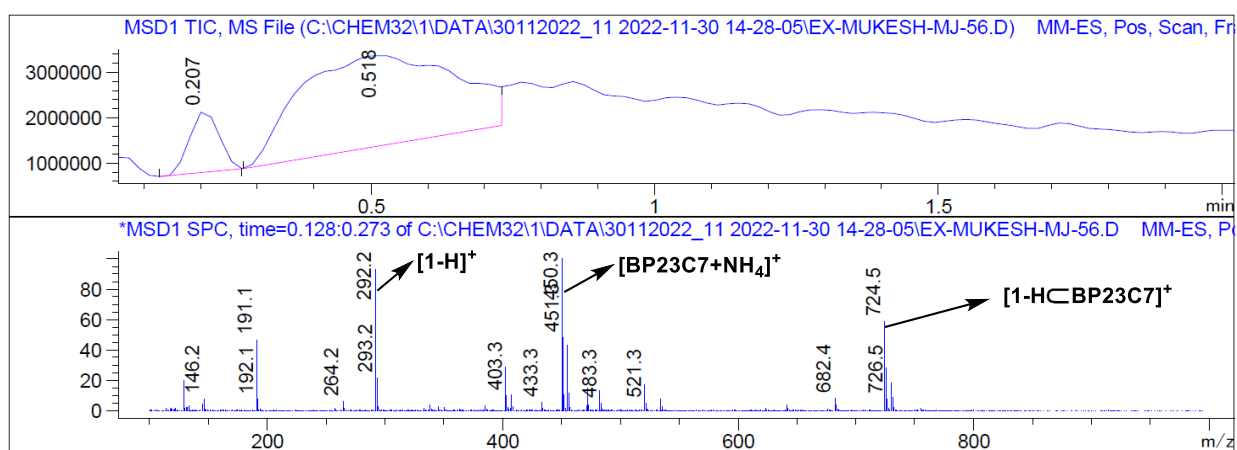

**Figure S3.** ESI mass spectrum of the equimolar mixture of 1-H•PF<sub>6</sub> & BP23C7 displayed base peak at  $m/z = 724.5$  [M-PF<sub>6</sub>]<sup>+</sup>, where “M” corresponds to the pseudo[2]rotaxane species 1-H⊂BP23C7•PF<sub>6</sub>.

## 5. $^1\text{H}$ NMR spectrum of a 1:1 mixture of $1\text{-H}\cdot\text{PF}_6$ & BP23C7

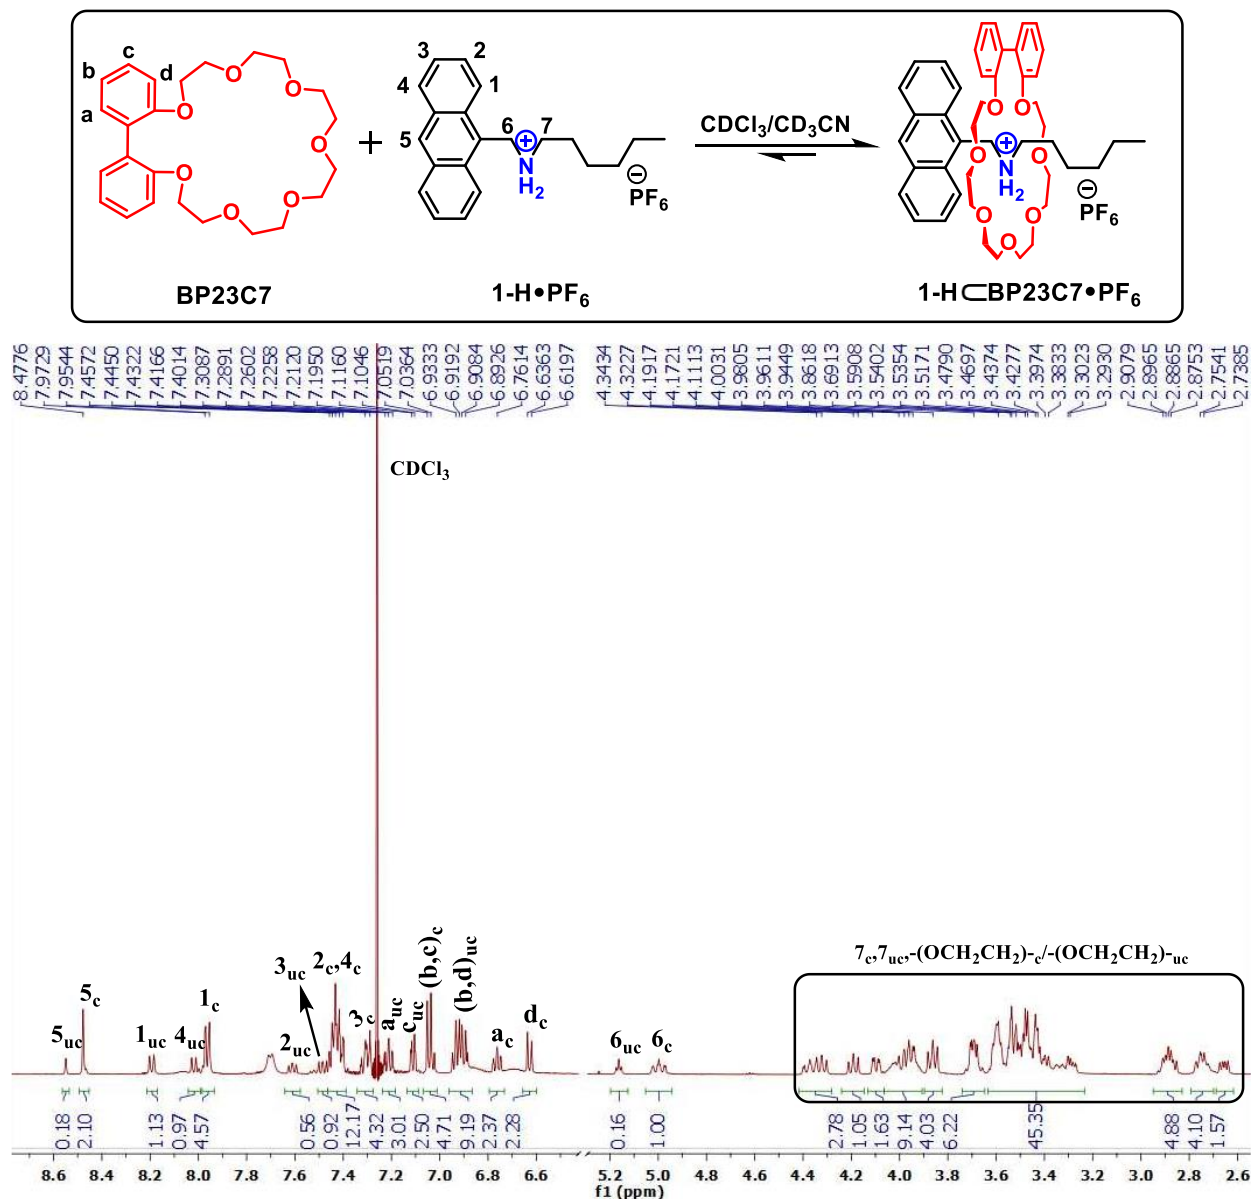

**Figure S4.**  $^1\text{H}$  NMR spectrum (500 MHz,  $\text{CDCl}_3/\text{CD}_3\text{CN} = 11:1$ ) of a 5mM equimolar mixture of  $1\text{-H}\cdot\text{PF}_6$  & BP23C7.  $K_a$  value calculated from integrations of the complexed and the uncomplexed peaks “6” of  $1\text{-H}\cdot\text{PF}_6$  is  $[(1.00/1.16) \times 5.00 \times 10^{-3}] / [(1 - 1.00/1.16) \times 5.00 \times 10^{-3}]^2 = 9.0 \times 10^3 \text{ M}^{-1}$ .

## 6. Optical data of the mixture of 1-H•PF<sub>6</sub> & BP23C7

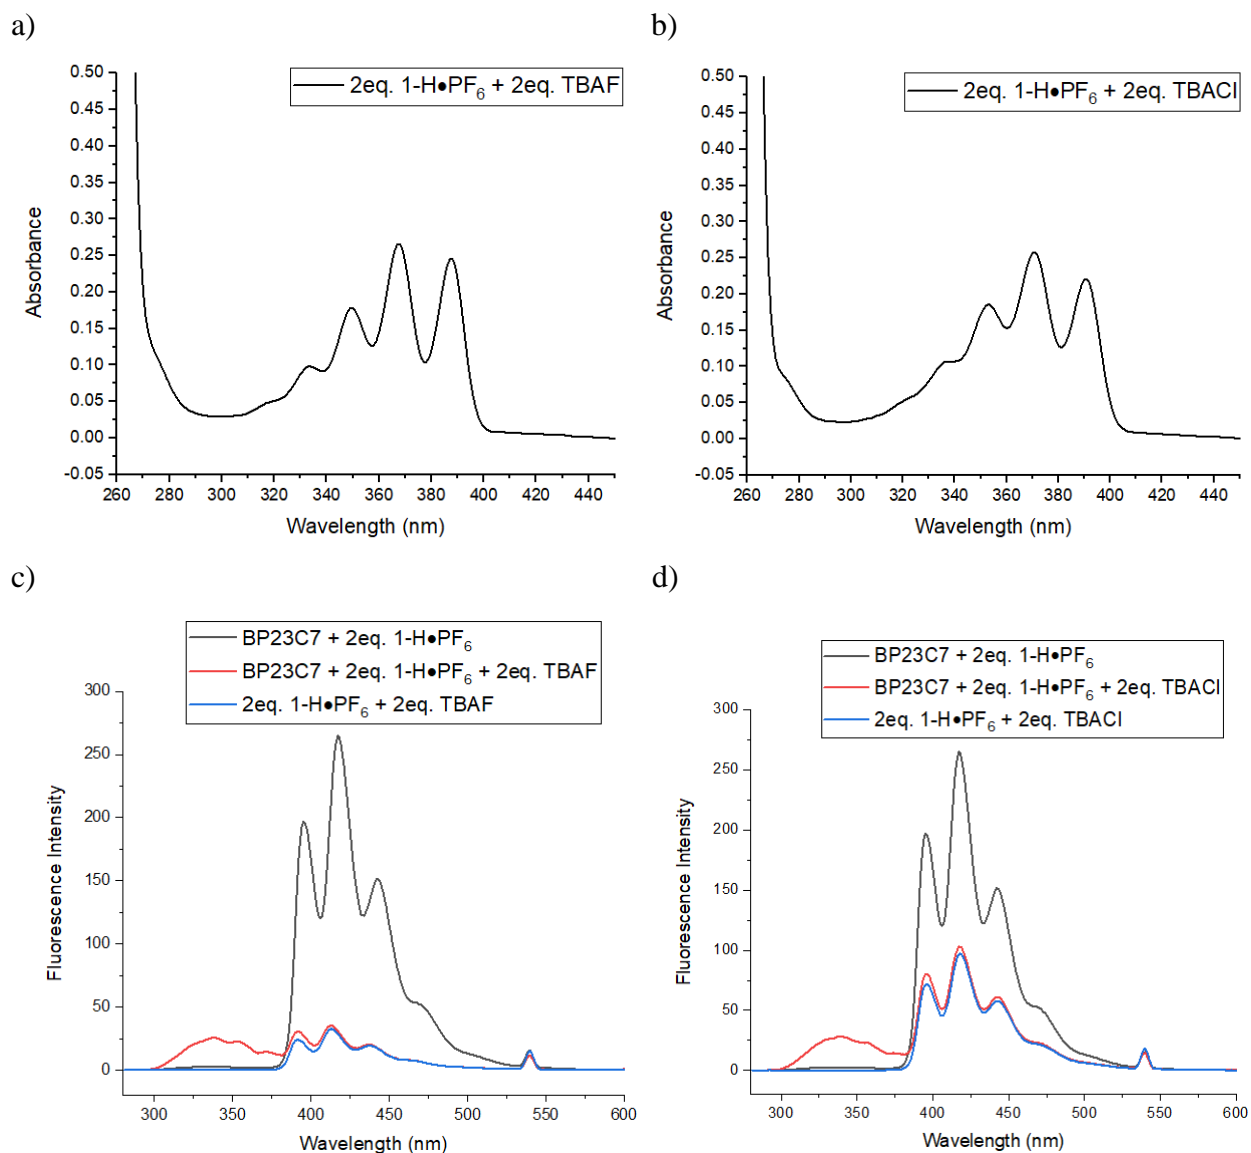

**Figure S5.** Absorption spectra (CH<sub>2</sub>Cl<sub>2</sub>, 298 K) of a) 2eq. 1-H•PF<sub>6</sub> ( $4 \times 10^{-5} \text{ M}^{-1}$ ) + 2eq. TBAF; and b) 2eq. 1-H•PF<sub>6</sub> ( $4 \times 10^{-5} \text{ M}^{-1}$ ) + 2eq. TBACl.

Fluorescence spectra (CH<sub>2</sub>Cl<sub>2</sub>,  $\lambda_{\text{exc}} = 270 \text{ nm}$ , 298 K) of c) BP23C7 ( $2 \times 10^{-5} \text{ M}^{-1}$ ) + 2eq. 1-H•PF<sub>6</sub> (black), BP23C7 + 2eq. 1-H•PF<sub>6</sub> + 2eq. TBAF (red), 2eq. 1-H•PF<sub>6</sub> + 2eq. TBAF (blue); and d) BP23C7 ( $2 \times 10^{-5} \text{ M}^{-1}$ ) + 2eq. 1-H•PF<sub>6</sub> (black), BP23C7 + 2eq. 1-H•PF<sub>6</sub> + 2eq. TBACl (red), 2eq. 1-H•PF<sub>6</sub> + 2eq. TBACl (blue).

## 7. Nominal ESI-MS of a 1:1 mixture of 2-H•PF<sub>6</sub> & BP23C7

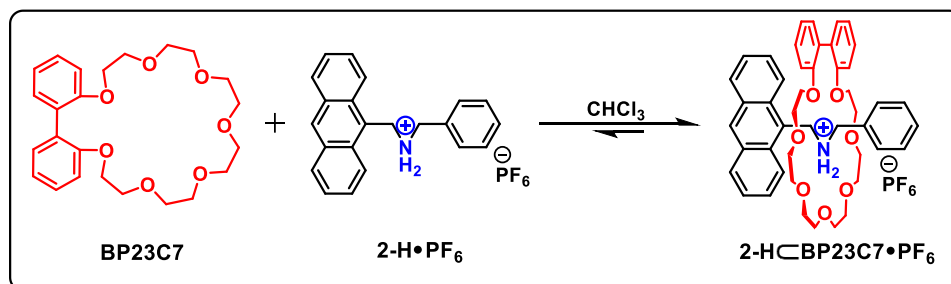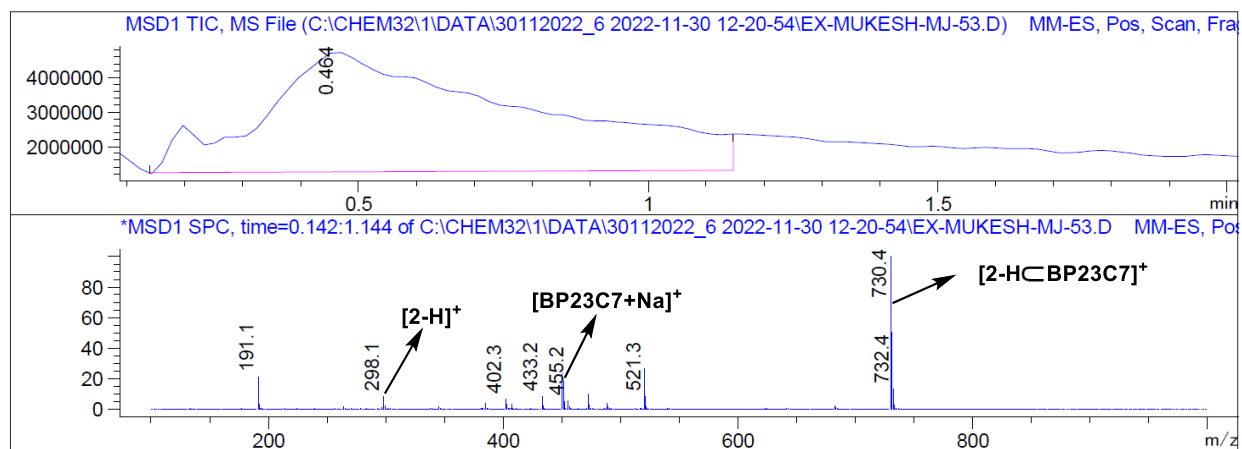

**Figure S6.** ESI mass spectrum of the equimolar mixture of 2-H•PF<sub>6</sub> & BP23C7 displayed base peak at  $m/z = 730.4$  [M-PF<sub>6</sub>]<sup>+</sup>, where “M” corresponds to the pseudo[2]rotaxane species 2-H⊂BP23C7•PF<sub>6</sub>.



## 8. $^1\text{H}$ NMR spectrum of a 1:1 mixture of $2\text{-H}\cdot\text{PF}_6$ & BP23C7

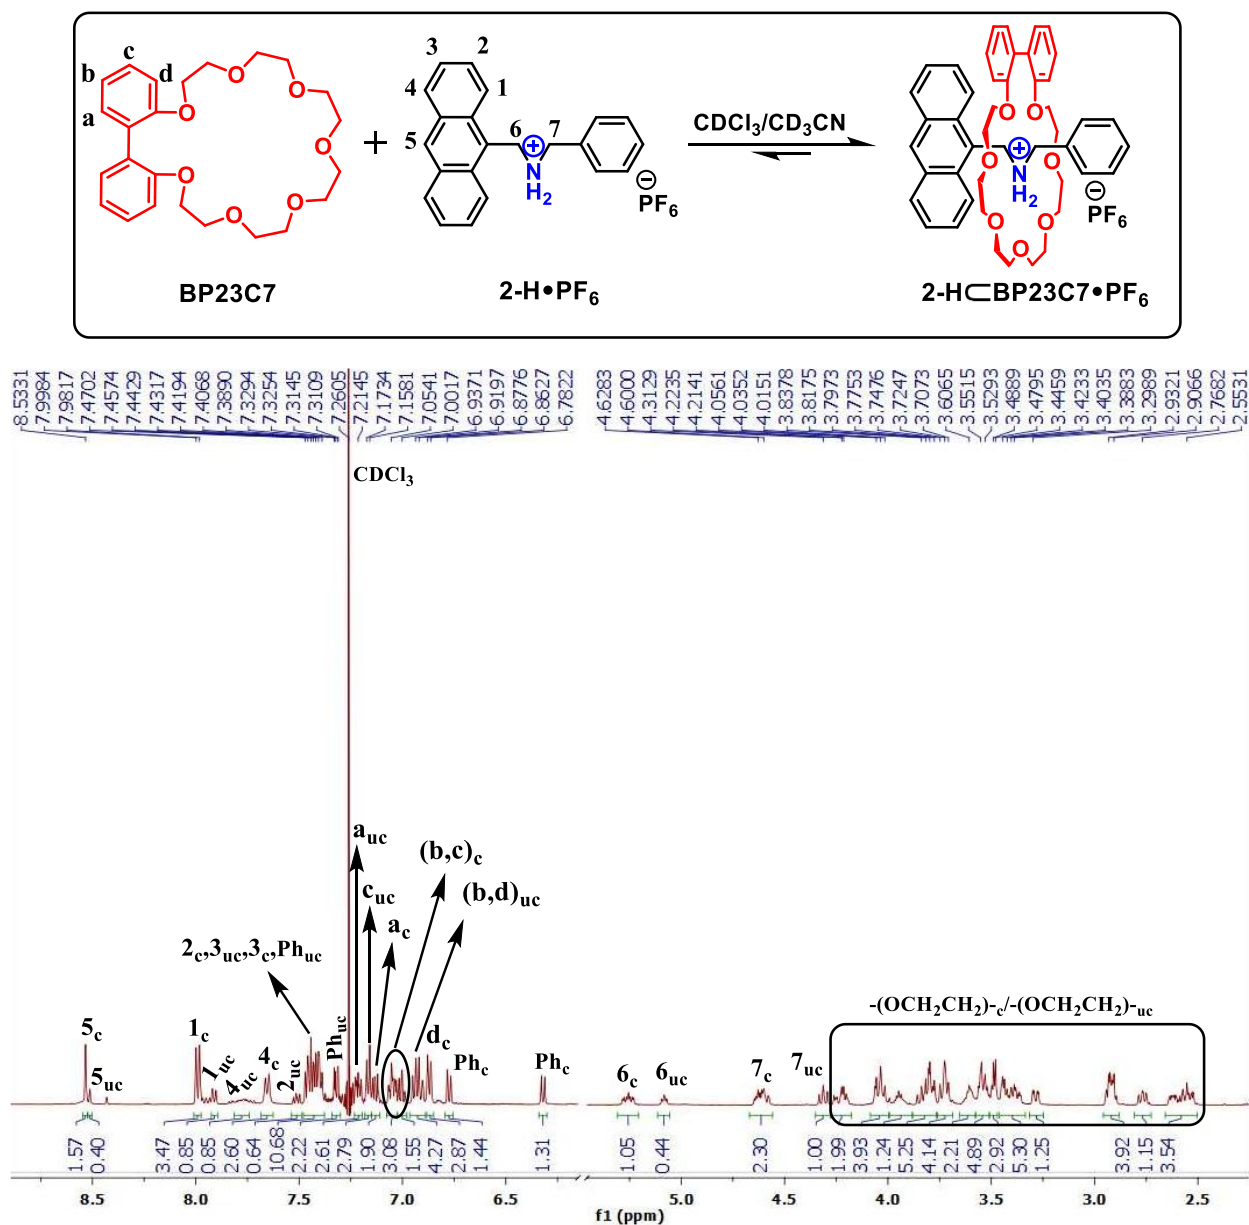

**Figure S7.**  $^1\text{H}$  NMR spectrum (500 MHz, CDCl<sub>3</sub>/CD<sub>3</sub>CN = 11:1) of a 5mM equimolar mixture of  $2\text{-H}\cdot\text{PF}_6$  & BP23C7.  $K_a$  value calculated from integrations of the complexed and the uncomplexed peaks “6” of  $2\text{-H}\cdot\text{PF}_6$  is  $[(1.05/1.49) \times 5.00 \times 10^{-3}] / [(1 - 1.05/1.49) \times 5.00 \times 10^{-3}]^2 = 1.6 \times 10^3 \text{ M}^{-1}$ .

## 9. Optical data of the mixture of 2-H•PF<sub>6</sub> & BP23C7

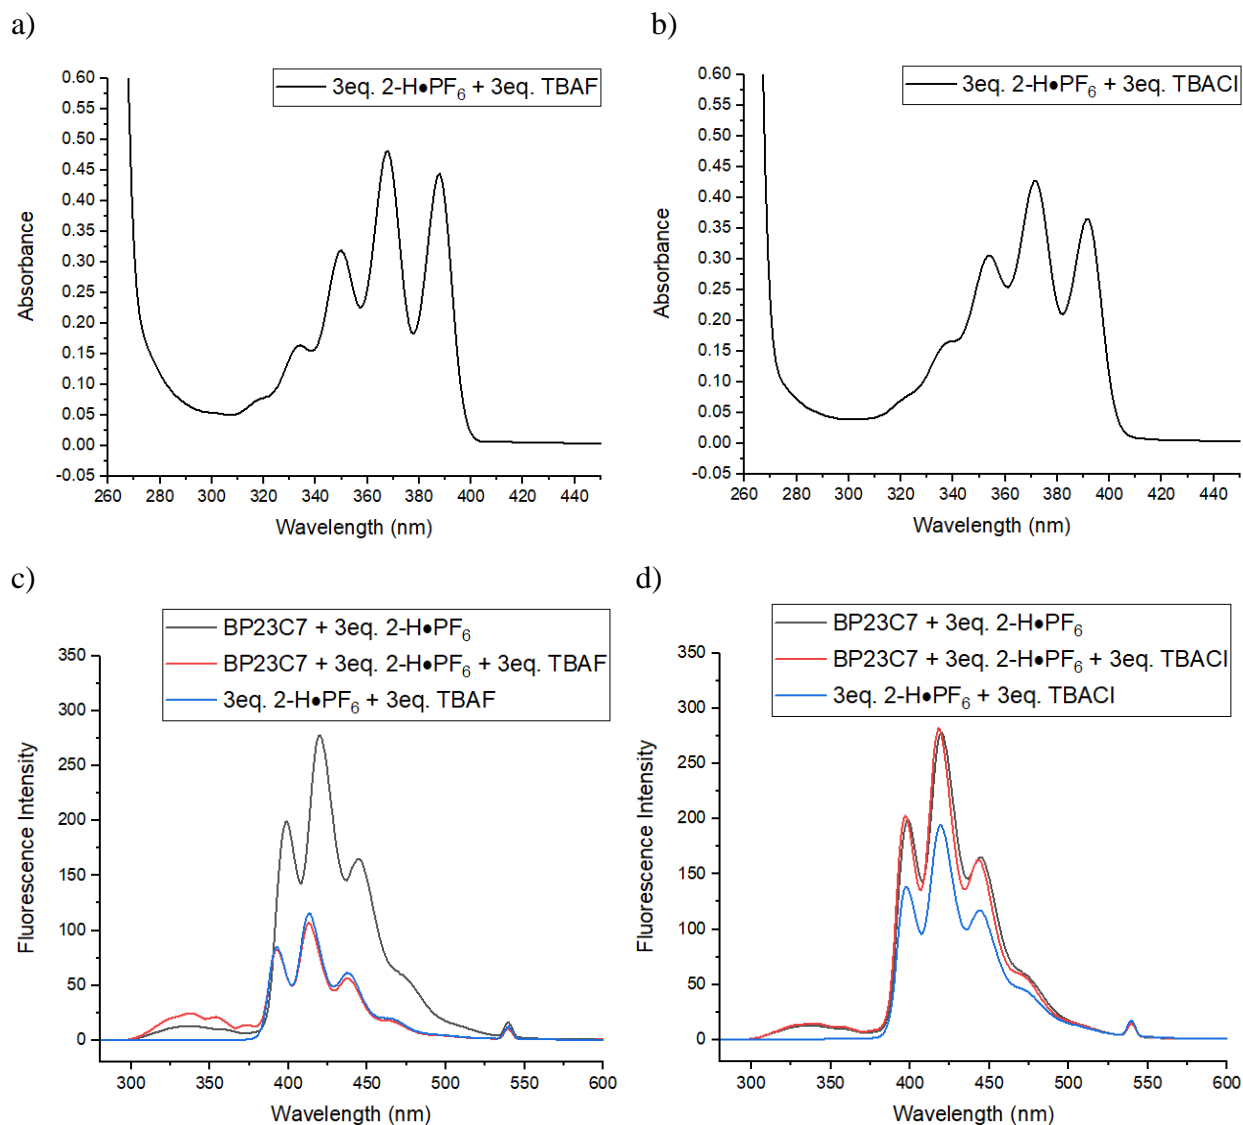

**Figure S8.** Absorption spectra (CH<sub>2</sub>Cl<sub>2</sub>, 298 K) of a) 3eq. 2-H•PF<sub>6</sub> ( $6 \times 10^{-5} \text{ M}^{-1}$ ) + 3eq. TBAF; and b) 3eq. 2-H•PF<sub>6</sub> ( $6 \times 10^{-5} \text{ M}^{-1}$ ) + 3eq. TBACl.

Fluorescence spectra (CH<sub>2</sub>Cl<sub>2</sub>,  $\lambda_{\text{exc}} = 270 \text{ nm}$ , 298 K) of c) BP23C7 ( $2 \times 10^{-5} \text{ M}^{-1}$ ) + 3eq. 2-H•PF<sub>6</sub> (black), BP23C7 + 3eq. 2-H•PF<sub>6</sub> + 3eq. TBAF (red), 3eq. 2-H•PF<sub>6</sub> + 3eq. TBAF (blue); and d) BP23C7 ( $2 \times 10^{-5} \text{ M}^{-1}$ ) + 3eq. 2-H•PF<sub>6</sub> (black), BP23C7 + 3eq. 2-H•PF<sub>6</sub> + 3eq. TBACl (red), 3eq. 2-H•PF<sub>6</sub> + 3eq. TBACl (blue).

## 10. Fluorescence titration of BP23C7 with 1-H·PF<sub>6</sub> & 1-H·Cl

a)

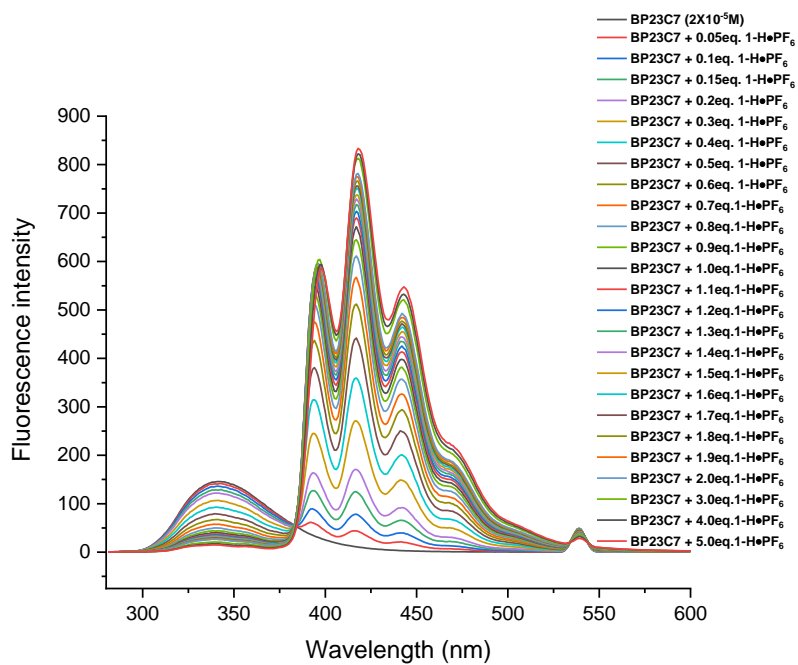

b)

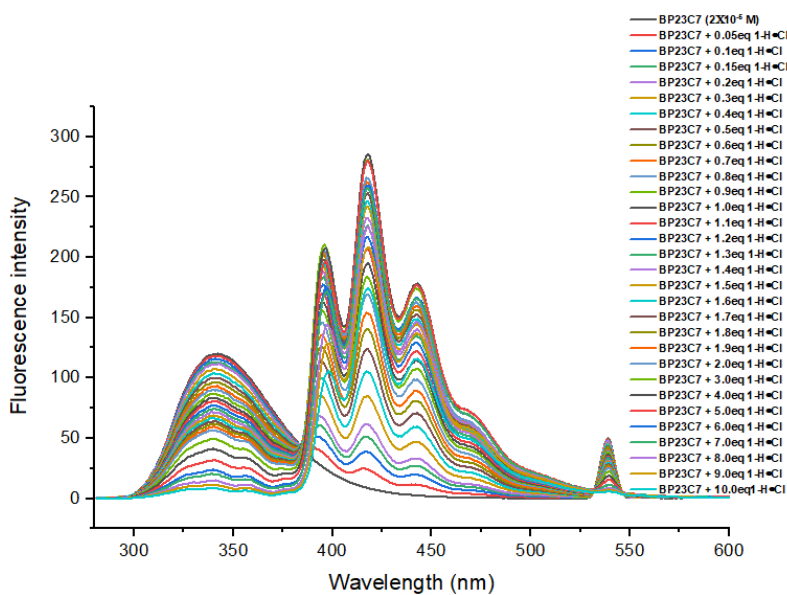

**Figure S9.** Fluorescence titration experiment of BP23C7 ( $2 \times 10^{-5}$  M) with a) 1-H·PF<sub>6</sub> and b) 1-H·Cl.

## 11. Fluorescence titration of BP23C7 with 2-H·PF<sub>6</sub>

a)

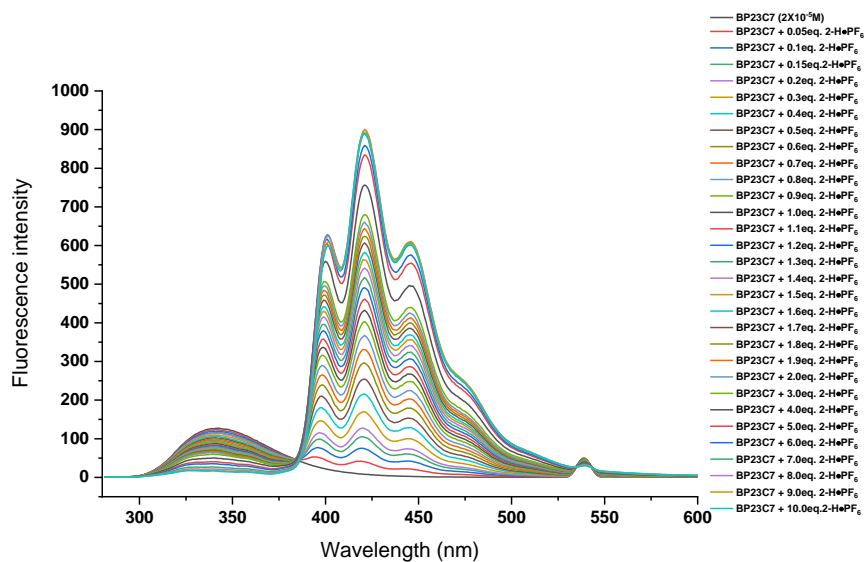

b)

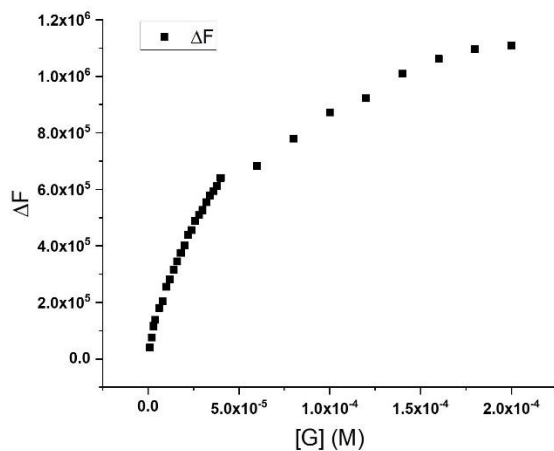

c)

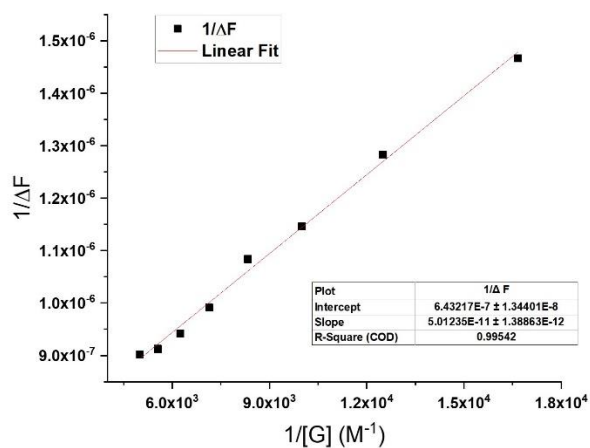

**Figure S10.** a) Fluorescence titration experiment of BP23C7 ( $2 \times 10^{-5}$  M) with 2-H·PF<sub>6</sub>, b) Plot of change in fluorescence quenching of BP23C7 with concentration of 2-H·PF<sub>6</sub>; c) Benesi-Hildebrand plot from fluorescence titration data of (a),  $K_a = \text{Intercept}/\text{Slope} = (1.283 \pm 0.008) \times 10^4 \text{ M}^{-1}$ .

## 12. 2D NOESY NMR spectrum of the [3]Rotaxane 10-H<sub>2</sub>•2PF<sub>6</sub>

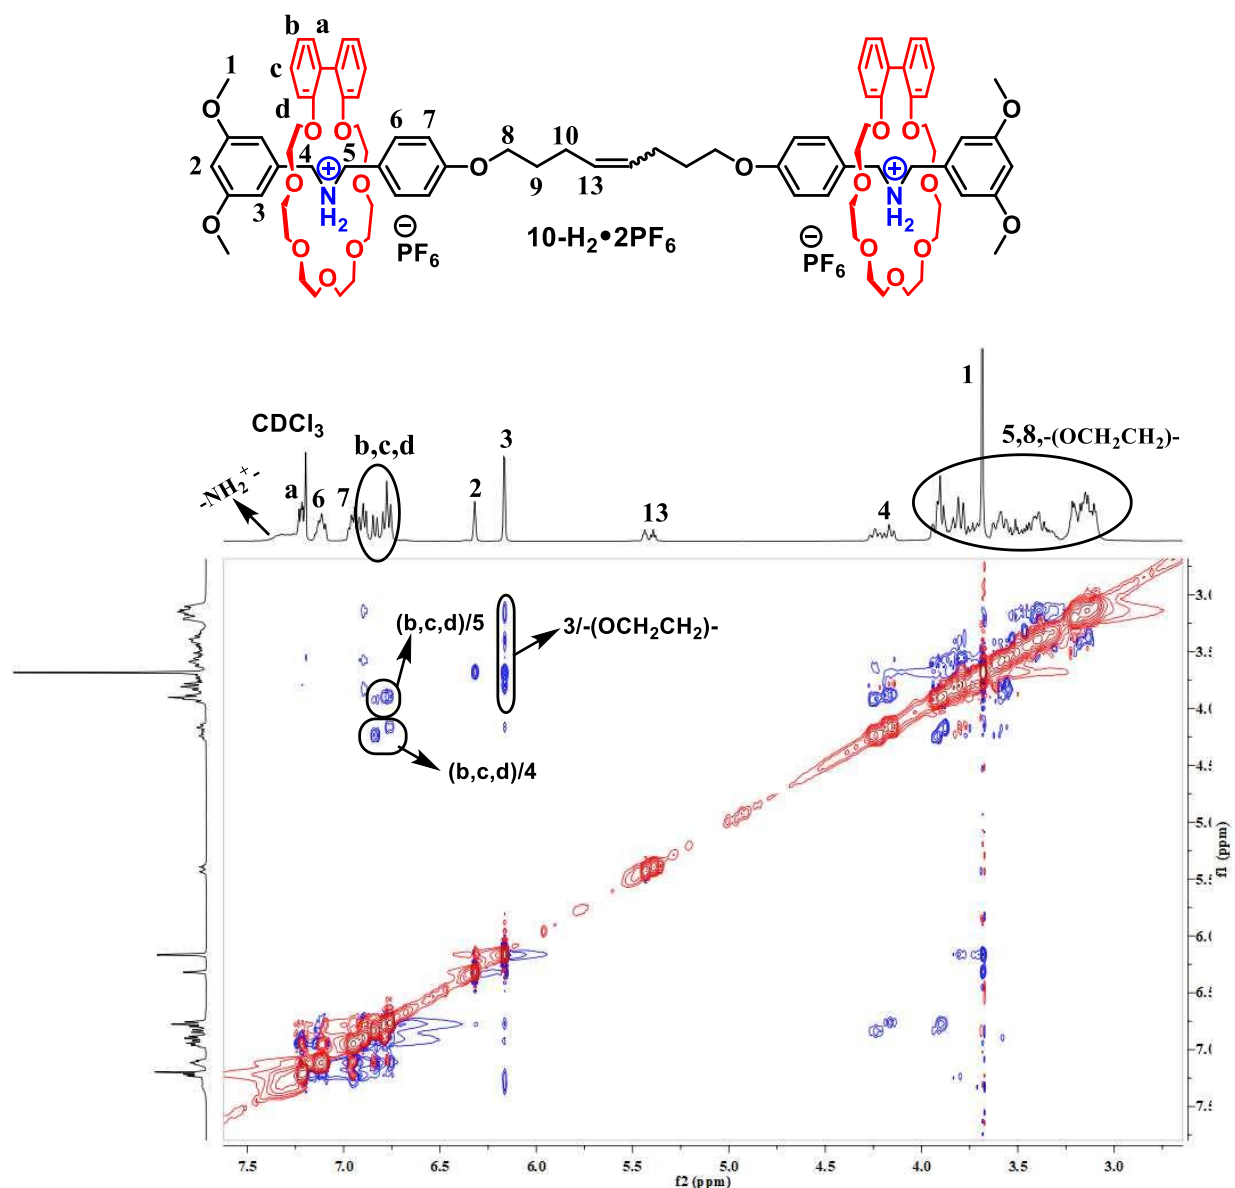

**Figure S11.** <sup>1</sup>H-<sup>1</sup>H NOESY NMR (400 MHz, CDCl<sub>3</sub>) of 10-H<sub>2</sub>•2PF<sub>6</sub>. In this case, a strong correlation between (-OCH<sub>2</sub>CH<sub>2</sub>-) protons of **BP23C7** with the aromatic protons H<sub>3</sub> of the stopper group is seen. Moreover, strong NOE cross peaks between **BP23C7** aromatic protons H<sub>b</sub>, H<sub>c</sub>, H<sub>d</sub> and the benzylic protons H<sub>4</sub> and H<sub>5</sub> of the axle corroborates the interlocking geometry.

### 13. HR ESI-MS spectrum of the [3]Rotaxane 10-H<sub>2</sub>•2PF<sub>6</sub>

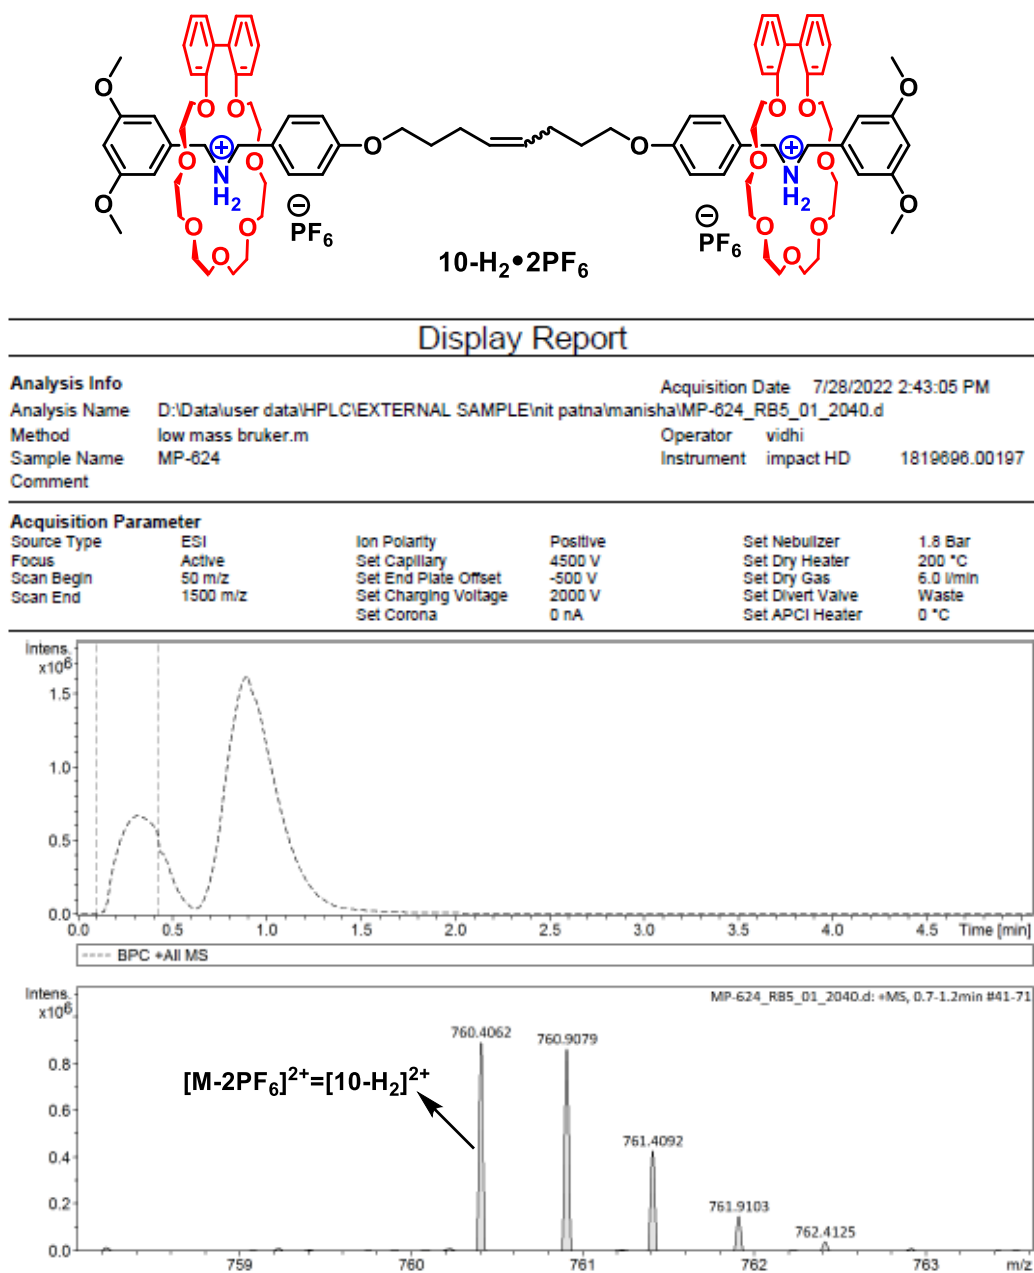

**Figure S12.** HR ESI-MS spectrum of the [3]rotaxane **10-H<sub>2</sub>•2PF<sub>6</sub>**. Peak at  $m/z = 760.4062$  corresponds to  $[M-2PF_6]^{2+}$  species. Isotopic distribution aptly reaffirms the effective species as the dicationic species,  $[10-H_2]^{2+}$ . HR MS (ESI):  $m/z$  Calcd for  $C_{88}H_{116}N_2O_{20}^{2+}$  ( $M-2PF_6$ )<sup>2+</sup>: 760.4055 (100%), 760.9072 (95.2%).

## 14. 2D NOESY NMR spectrum of the [3]Rotaxane 11-H<sub>2</sub>•2PF<sub>6</sub>

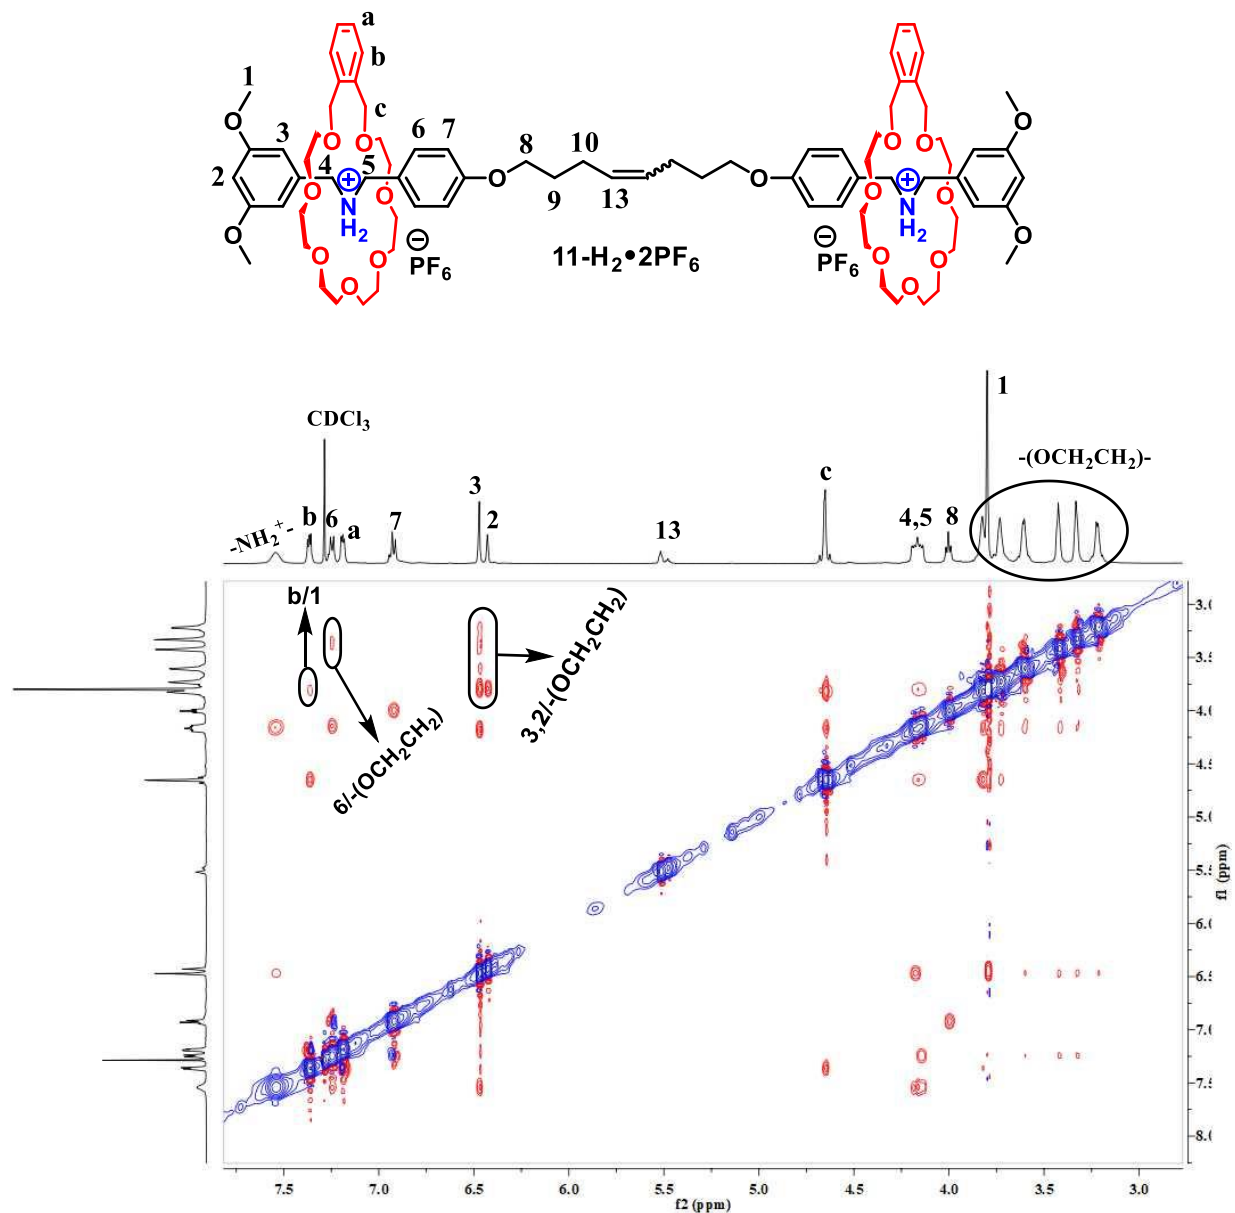

**Figure S13.** <sup>1</sup>H-<sup>1</sup>H NOESY NMR (400 MHz, CDCl<sub>3</sub>) of 11-H<sub>2</sub>•2PF<sub>6</sub>. In this case, strong correlations between (-OCH<sub>2</sub>CH<sub>2</sub>-) protons of X23C7 with the aromatic protons H<sub>2</sub>/H<sub>3</sub>/H<sub>6</sub> of the axle are observed. Additional correlations such as “H<sub>b</sub>/H<sub>1</sub>” unambiguously indicates the interlocked geometry.

## 15. HR ESI-MS spectrum of the [3]Rotaxane **11-H<sub>2</sub>·2PF<sub>6</sub>**

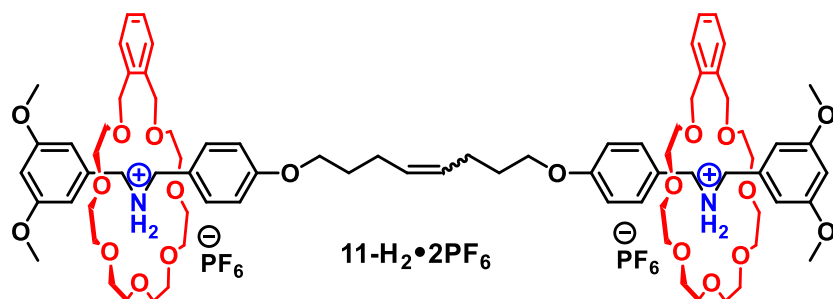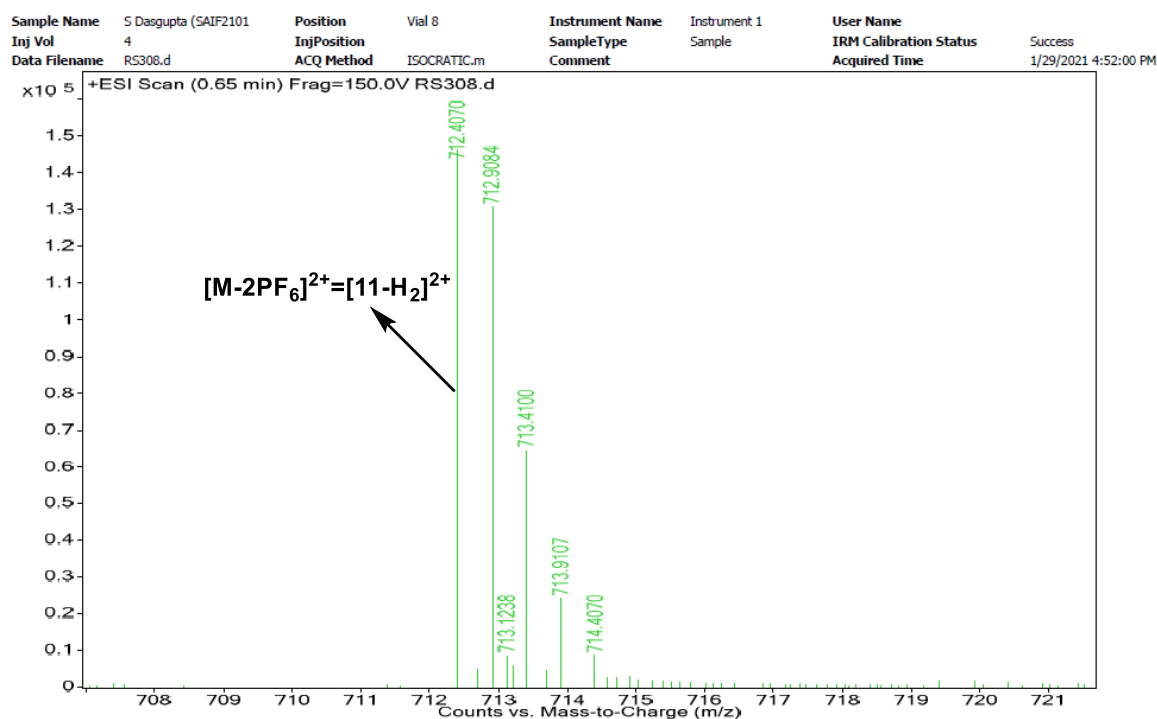

**Figure S14.** HR ESI-MS spectrum of the [3]rotaxane **11-H<sub>2</sub>·2PF<sub>6</sub>**. Peak at  $m/z = 712.4070$  corresponds to the  $[M-2PF_6]^{2+}$  species. Isotopic distribution clearly suggests the effective species as the dicationic species,  $[11-H_2]^{2+}$ . HR MS (ESI):  $m/z$  Calcd for  $C_{80}H_{116}N_2O_{20}^{2+}$  ( $M-2PF_6$ )<sup>2+</sup>: 712.4055 (100%), 712.9072 (86.5%).



## 16. $^1\text{H}$ NMR & $^{13}\text{C}$ NMR spectra of all synthesized compounds

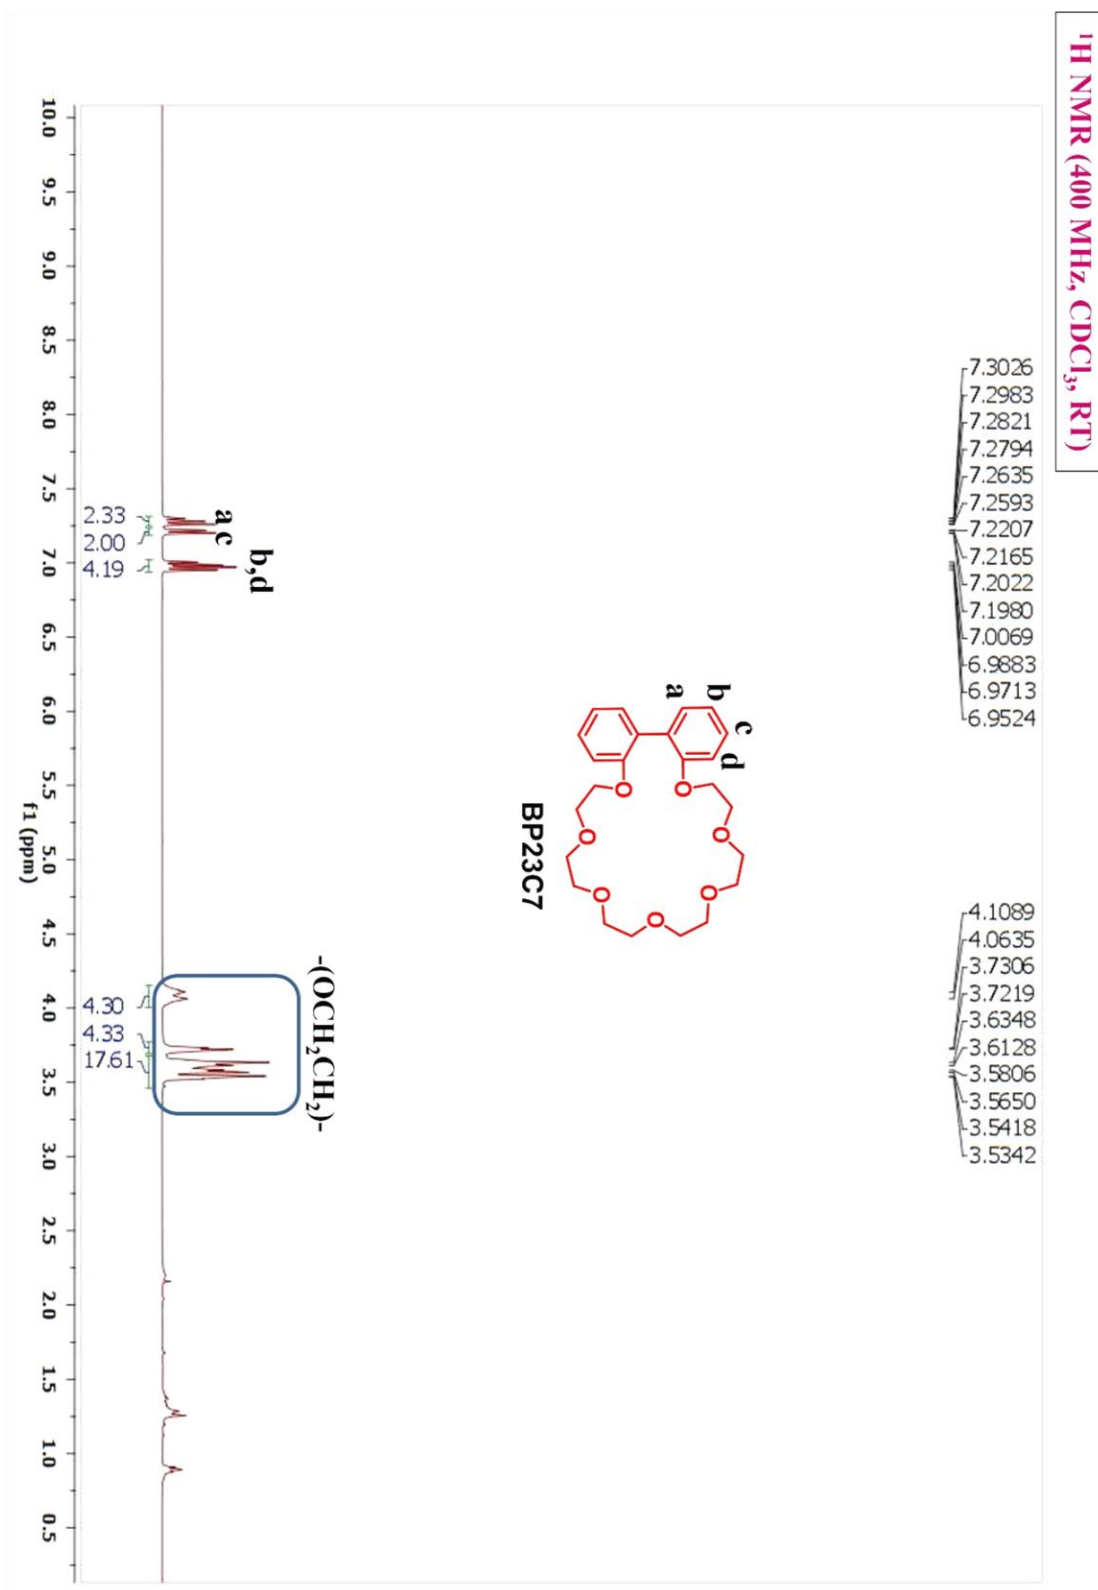



**<sup>1</sup>H NMR (500 MHz, CDCl<sub>3</sub>, RT)**

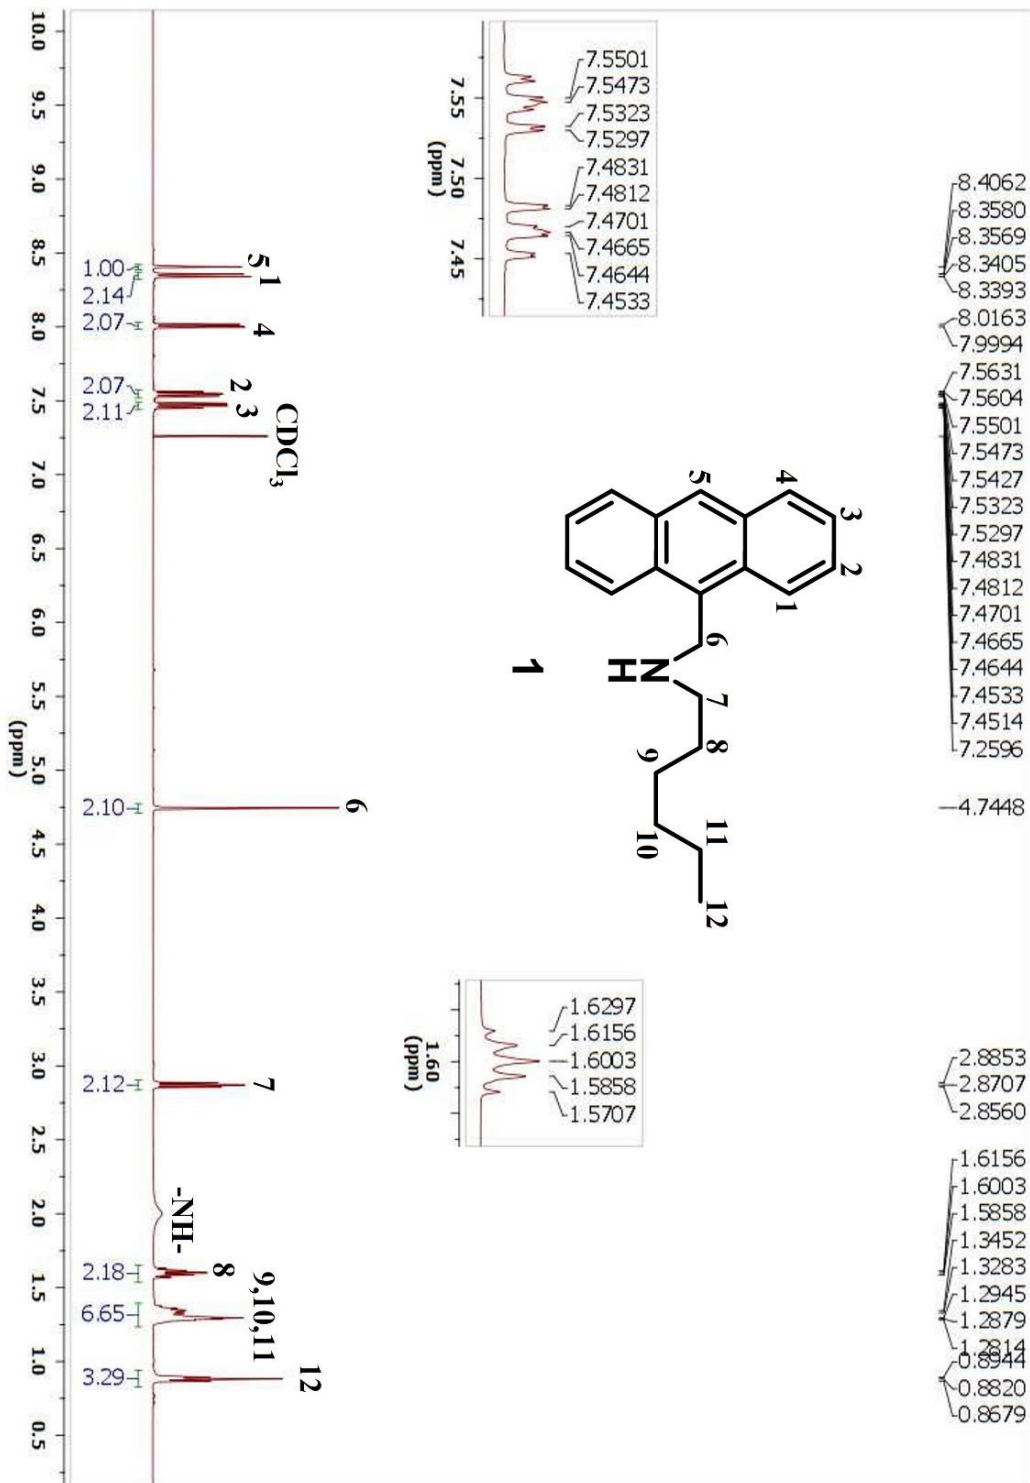

$^{13}\text{C}\{^1\text{H}\}$  NMR (125 MHz,  $\text{CDCl}_3$ , RT)

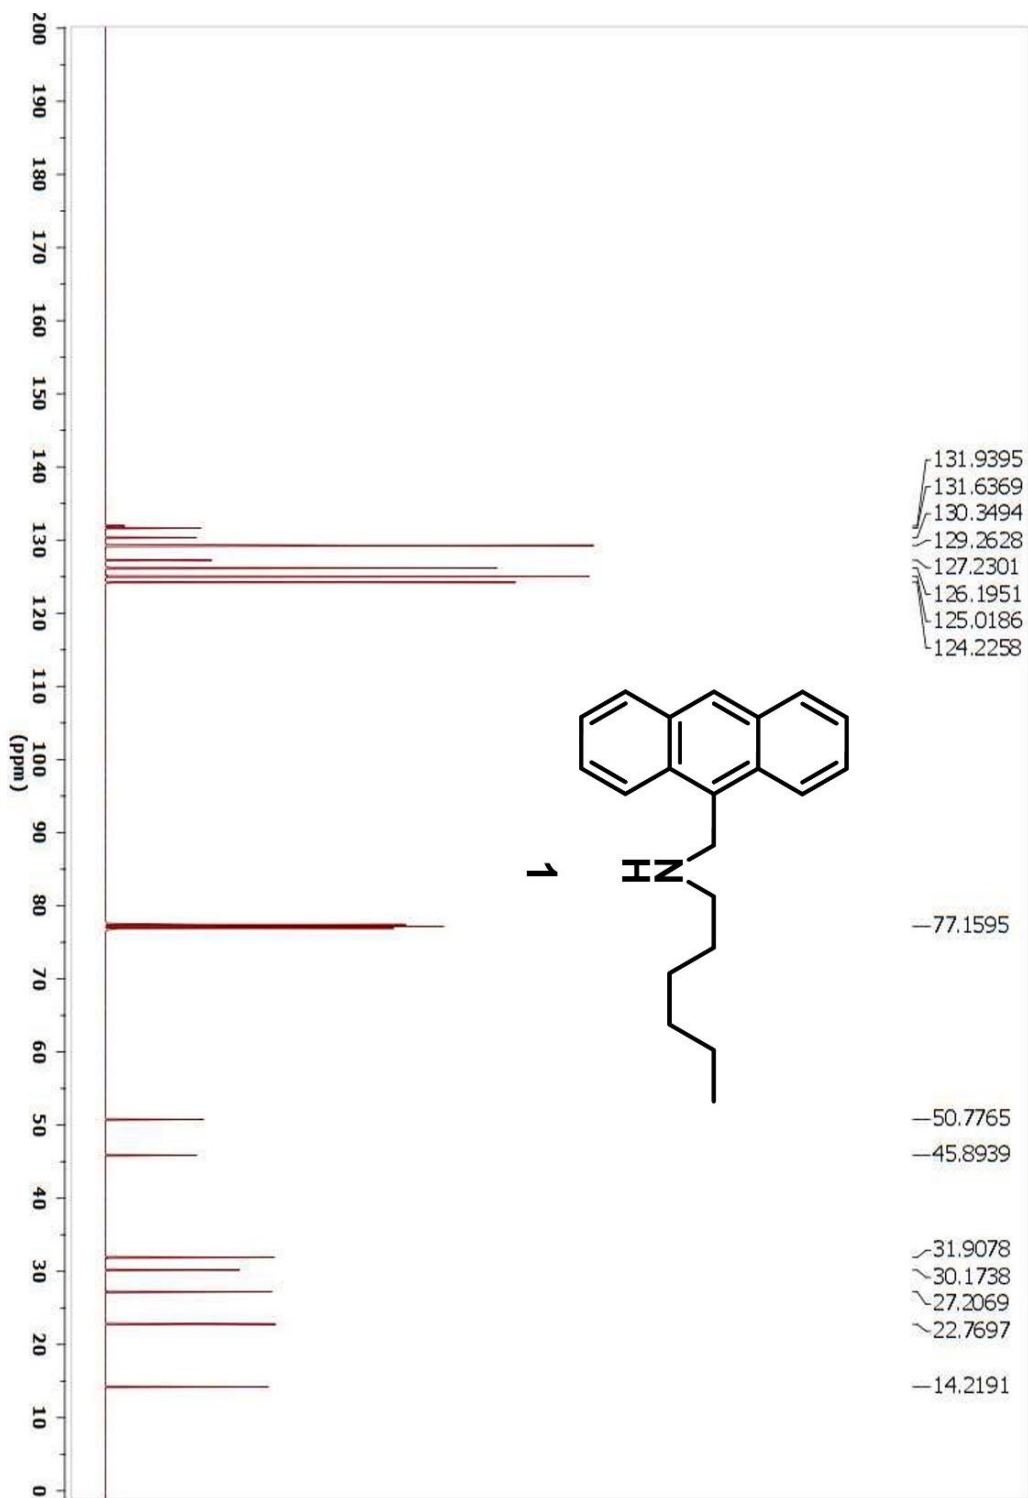



$^{13}\text{C}\{^1\text{H}\}$  NMR (125 MHz, DMSO- $d_6$ , RT)

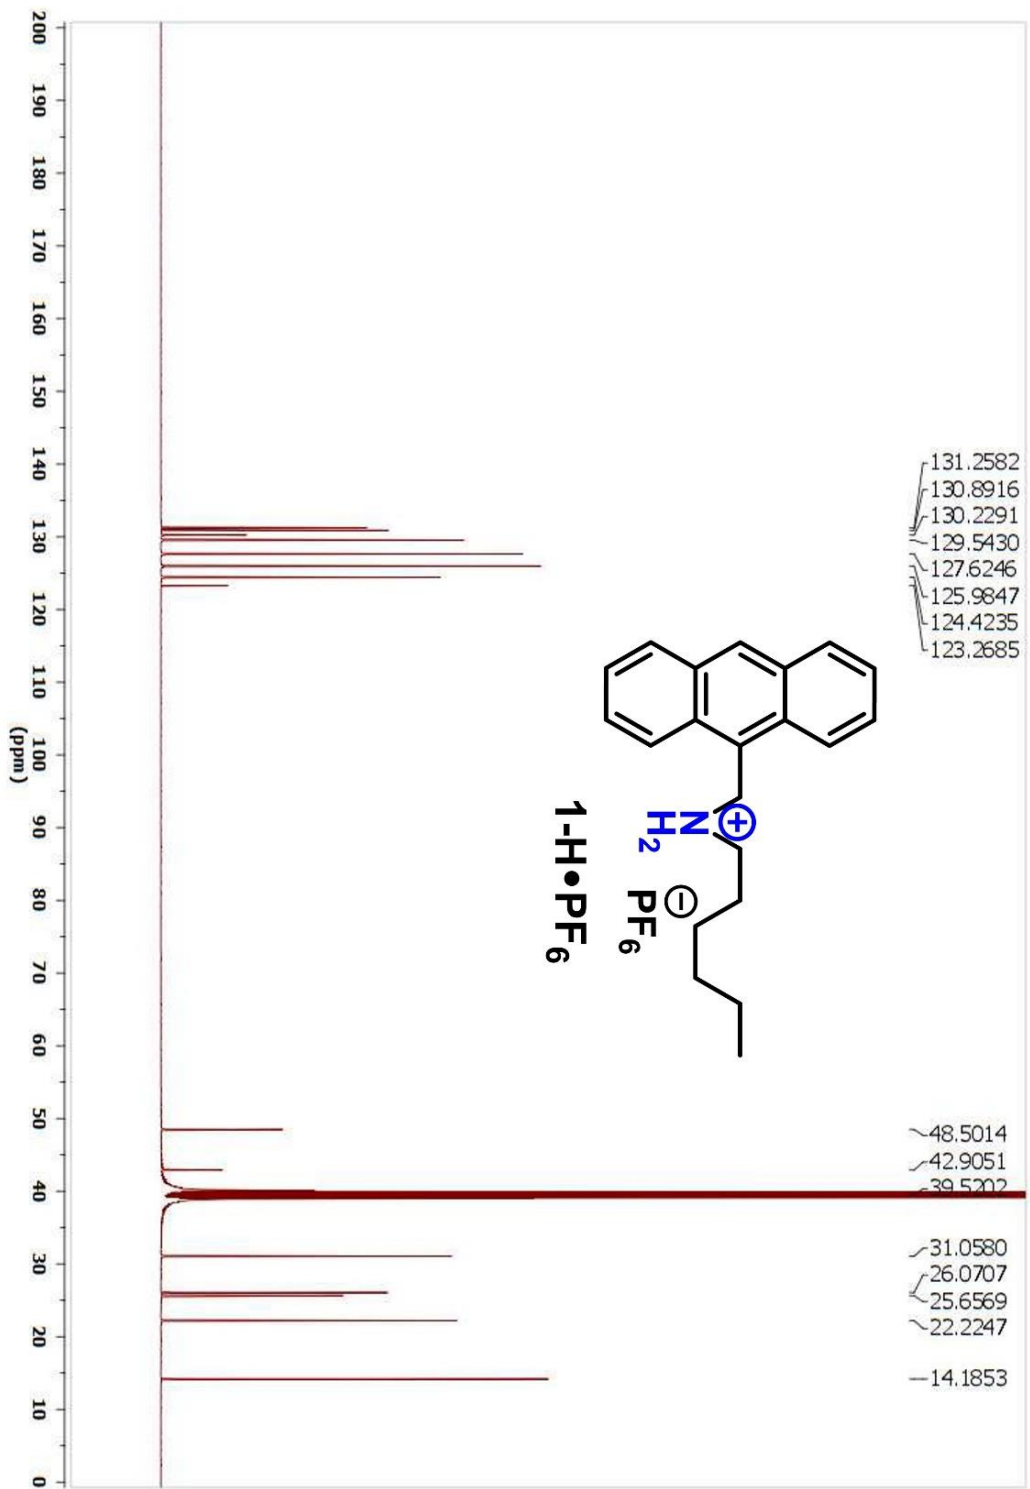

**<sup>1</sup>H NMR (500 MHz, CDCl<sub>3</sub>, RT)**

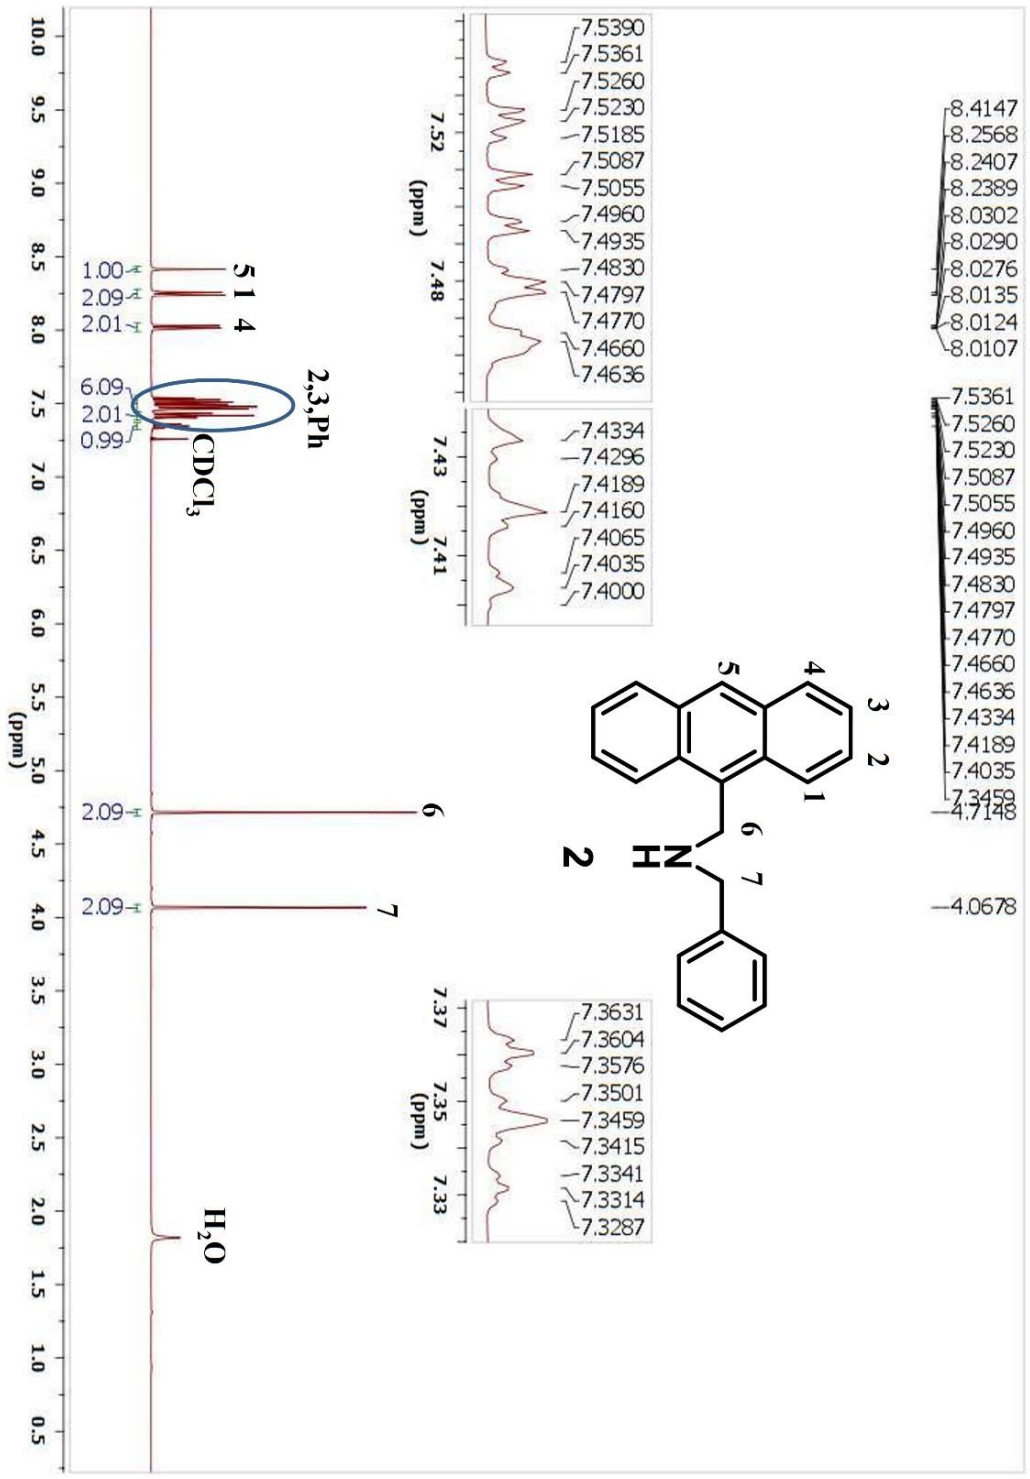

$^{13}\text{C}\{\text{H}\}$  NMR (125 MHz,  $\text{CDCl}_3$ , RT)

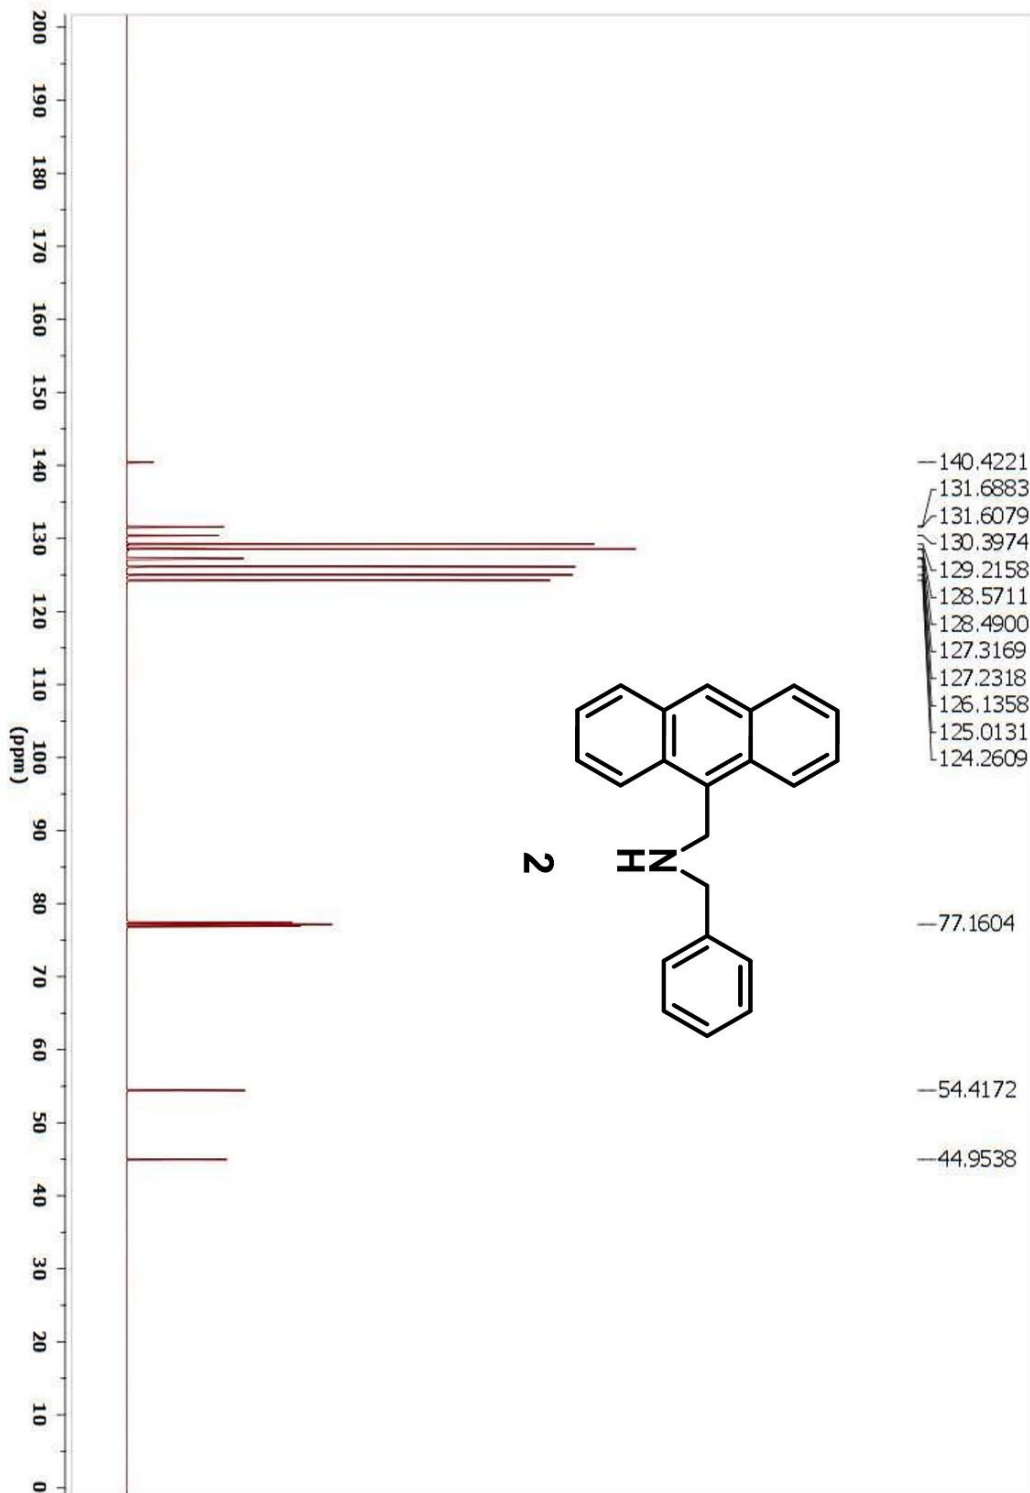



**<sup>1</sup>H NMR (500 MHz, CDCl<sub>3</sub>/CD<sub>3</sub>CN (11:1), RT)**

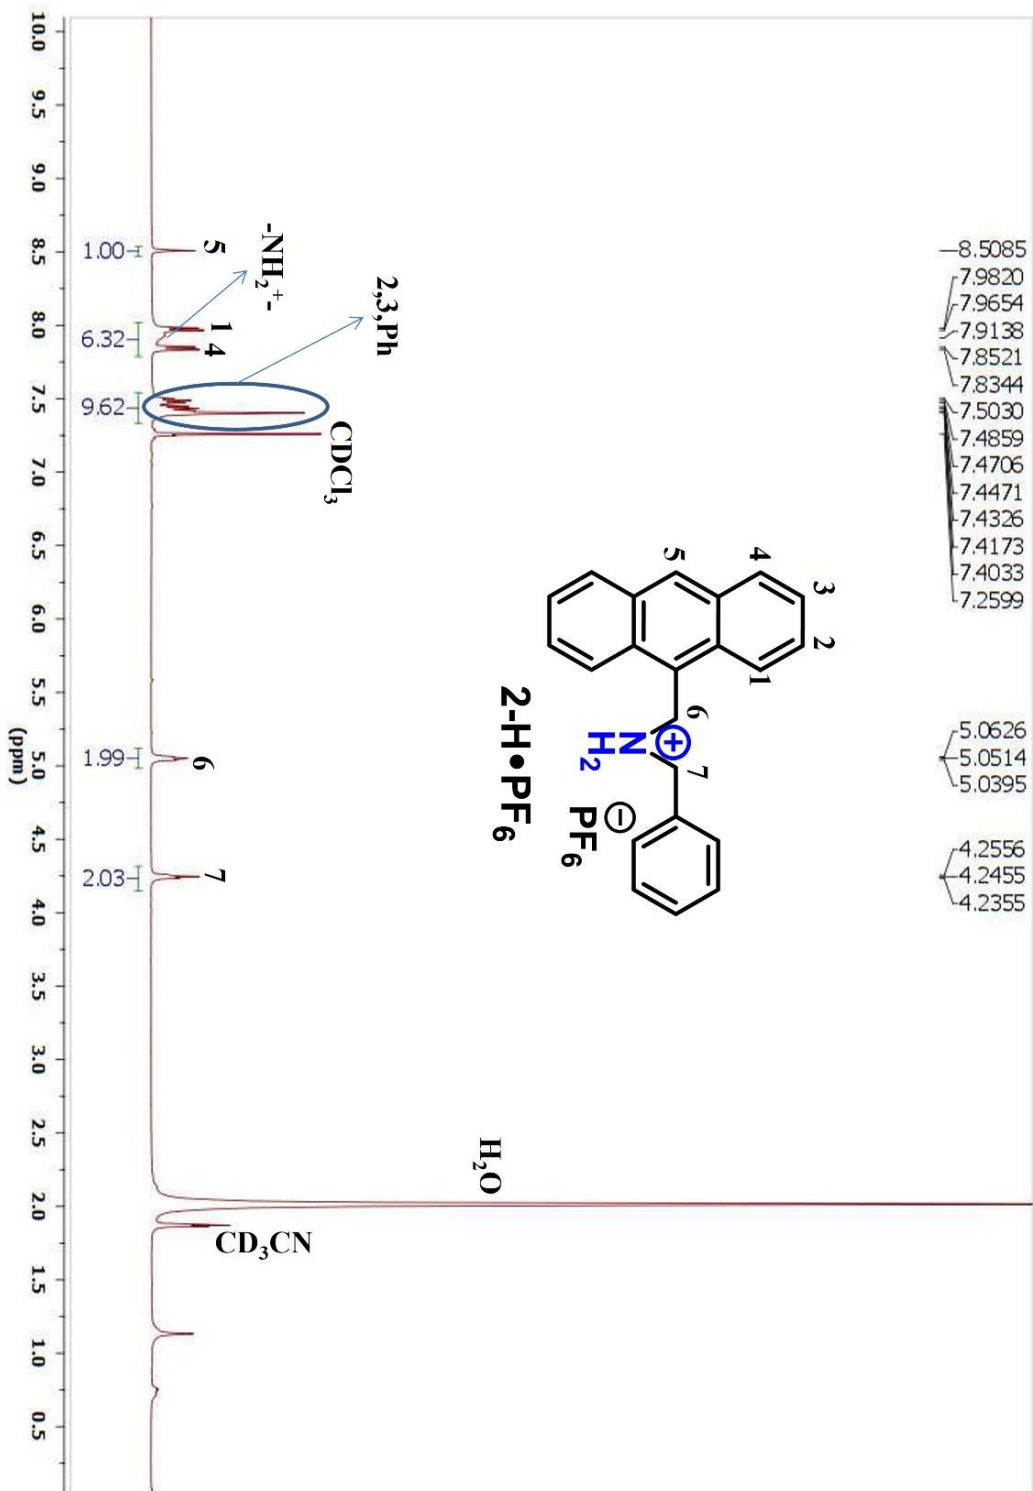

$^{13}\text{C}\{\text{H}\}$  NMR (125 MHz, DMSO- $d_6$ , RT)

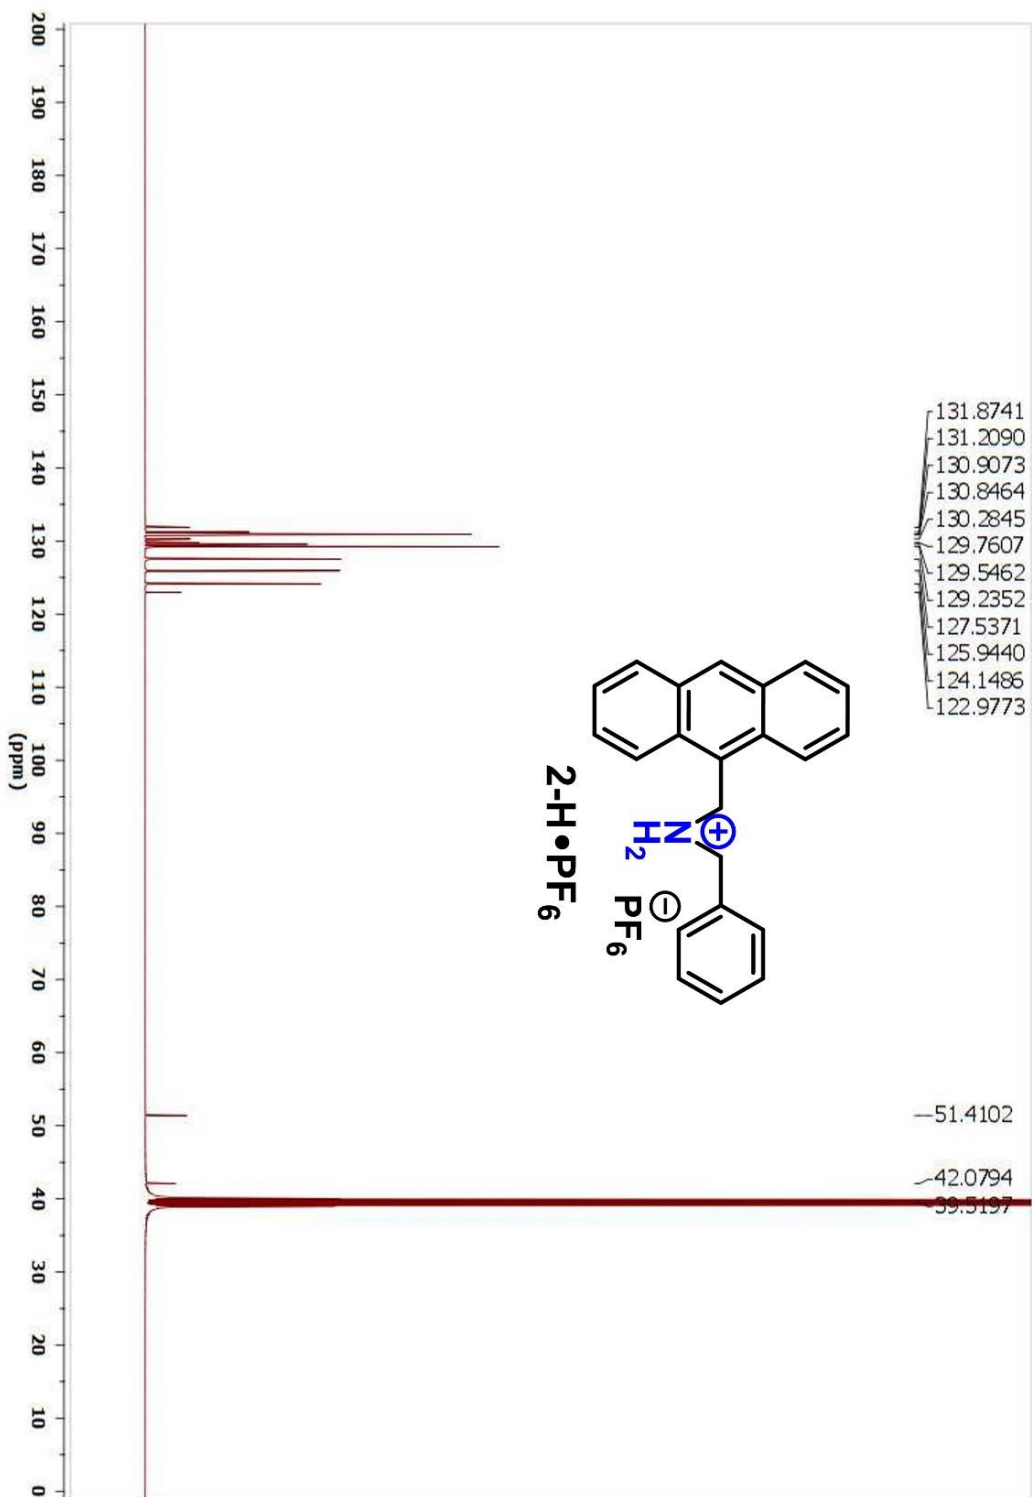

**<sup>1</sup>H NMR (400 MHz, CDCl<sub>3</sub>, RT)**

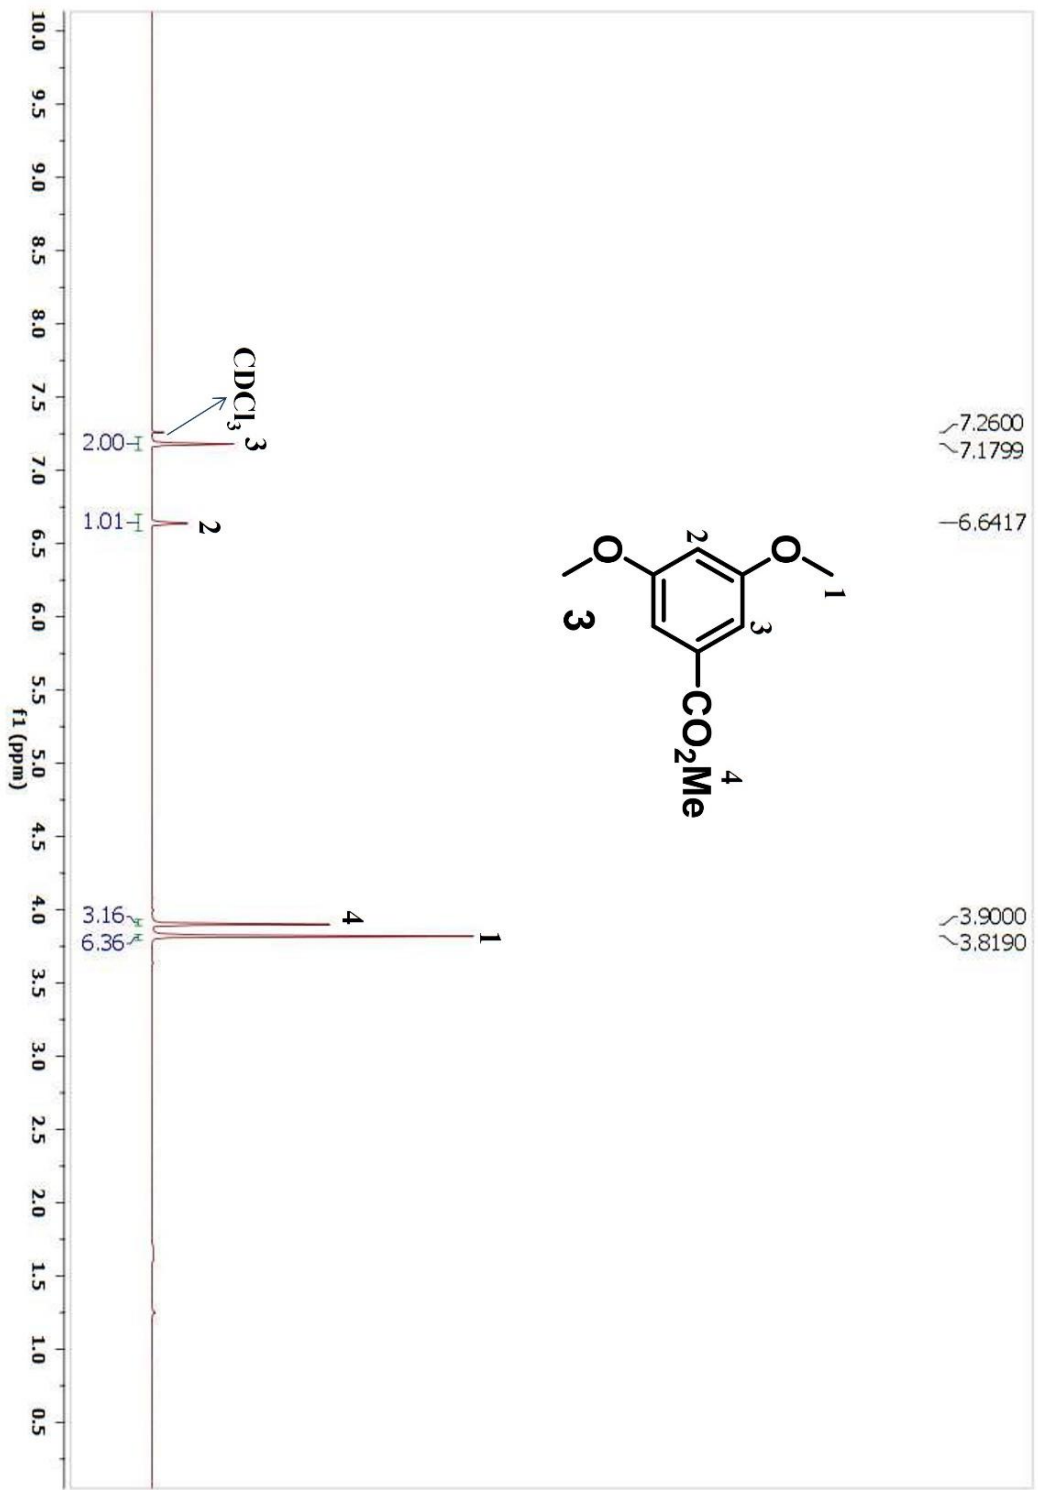

$^{13}\text{C}\{^1\text{H}\}$  NMR (100 MHz,  $\text{CDCl}_3$ , RT)

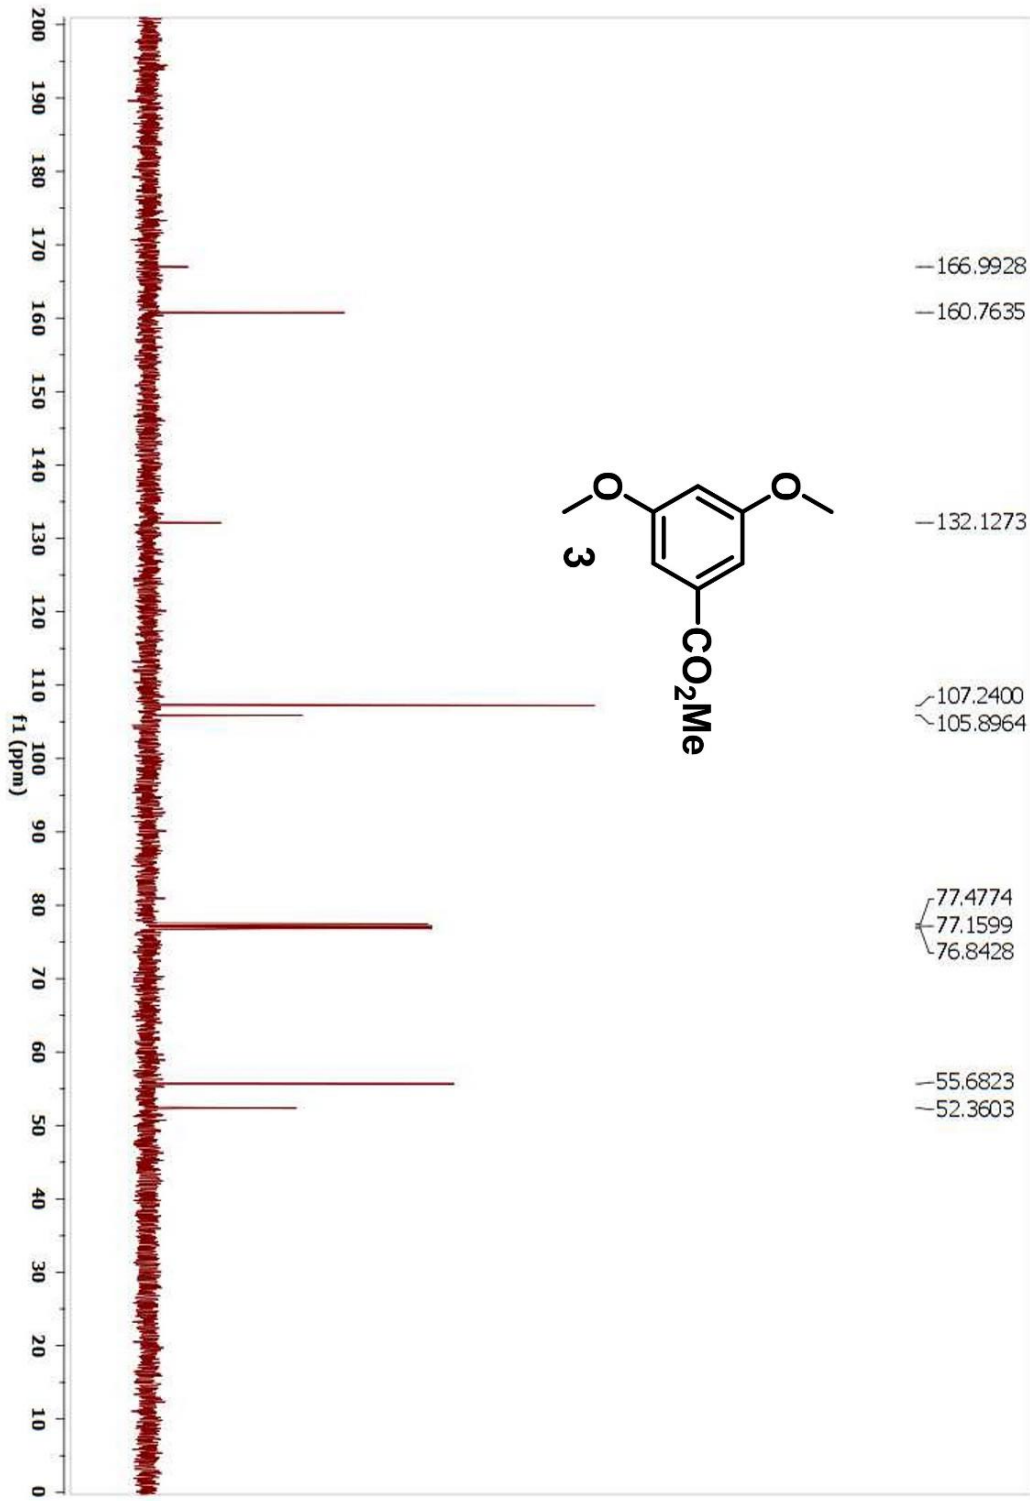

**<sup>1</sup>H NMR (500 MHz, CDCl<sub>3</sub>, RT)**

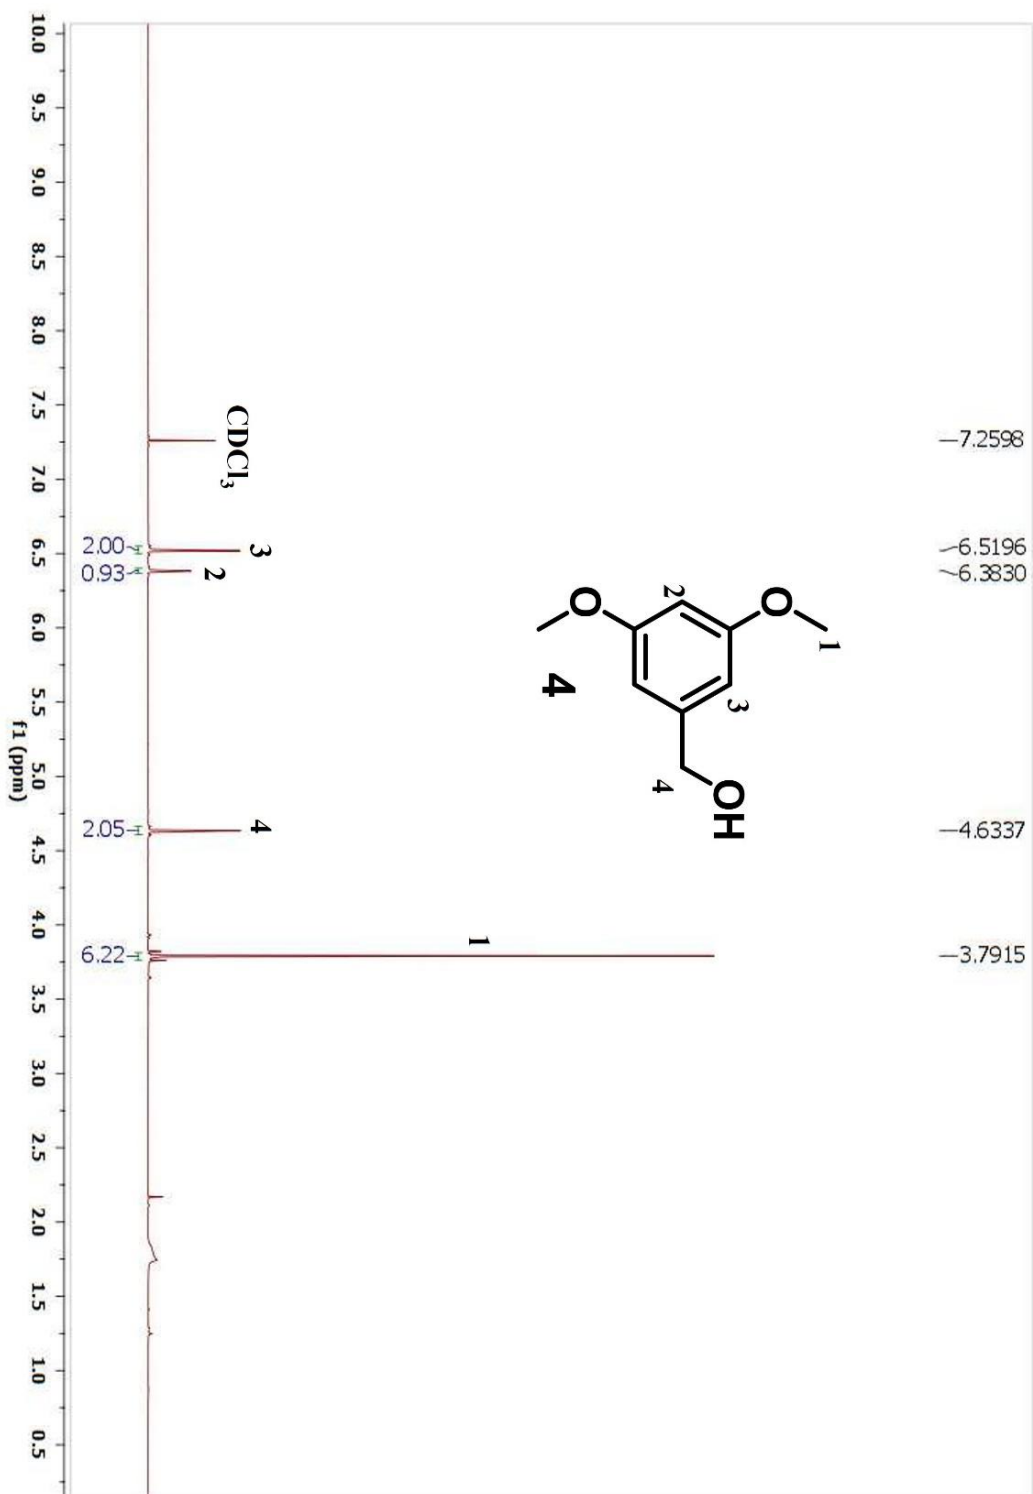

$^{13}\text{C}\{^1\text{H}\}$  NMR (100 MHz,  $\text{CDCl}_3$ , RT)

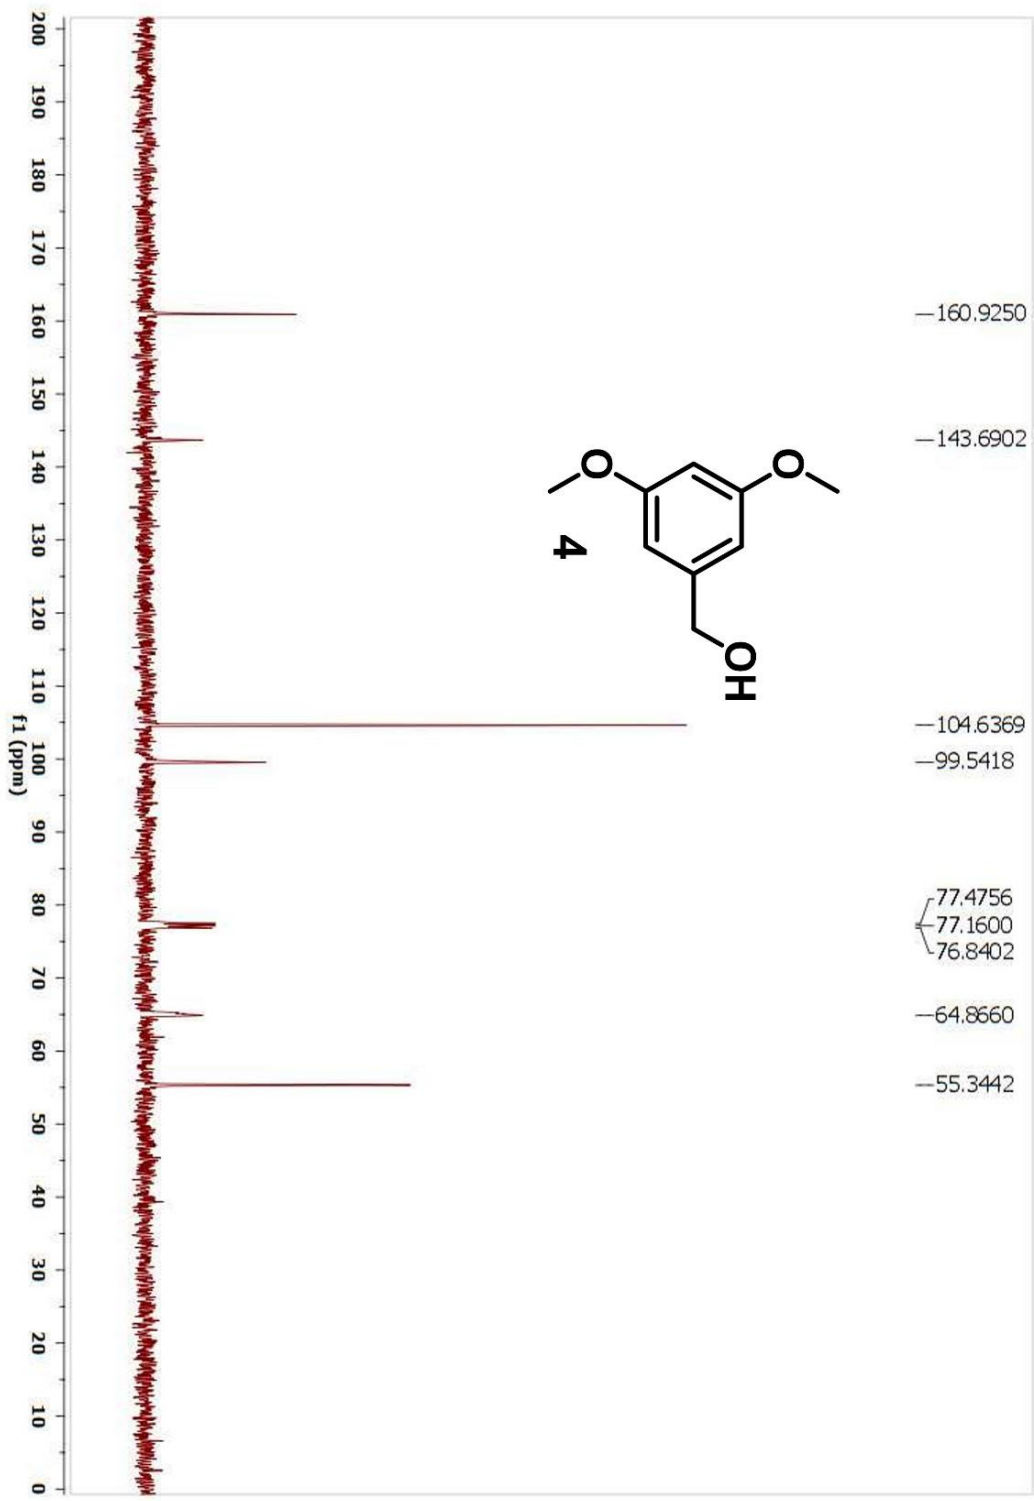

**<sup>1</sup>H NMR (500 MHz, CDCl<sub>3</sub>, RT)**

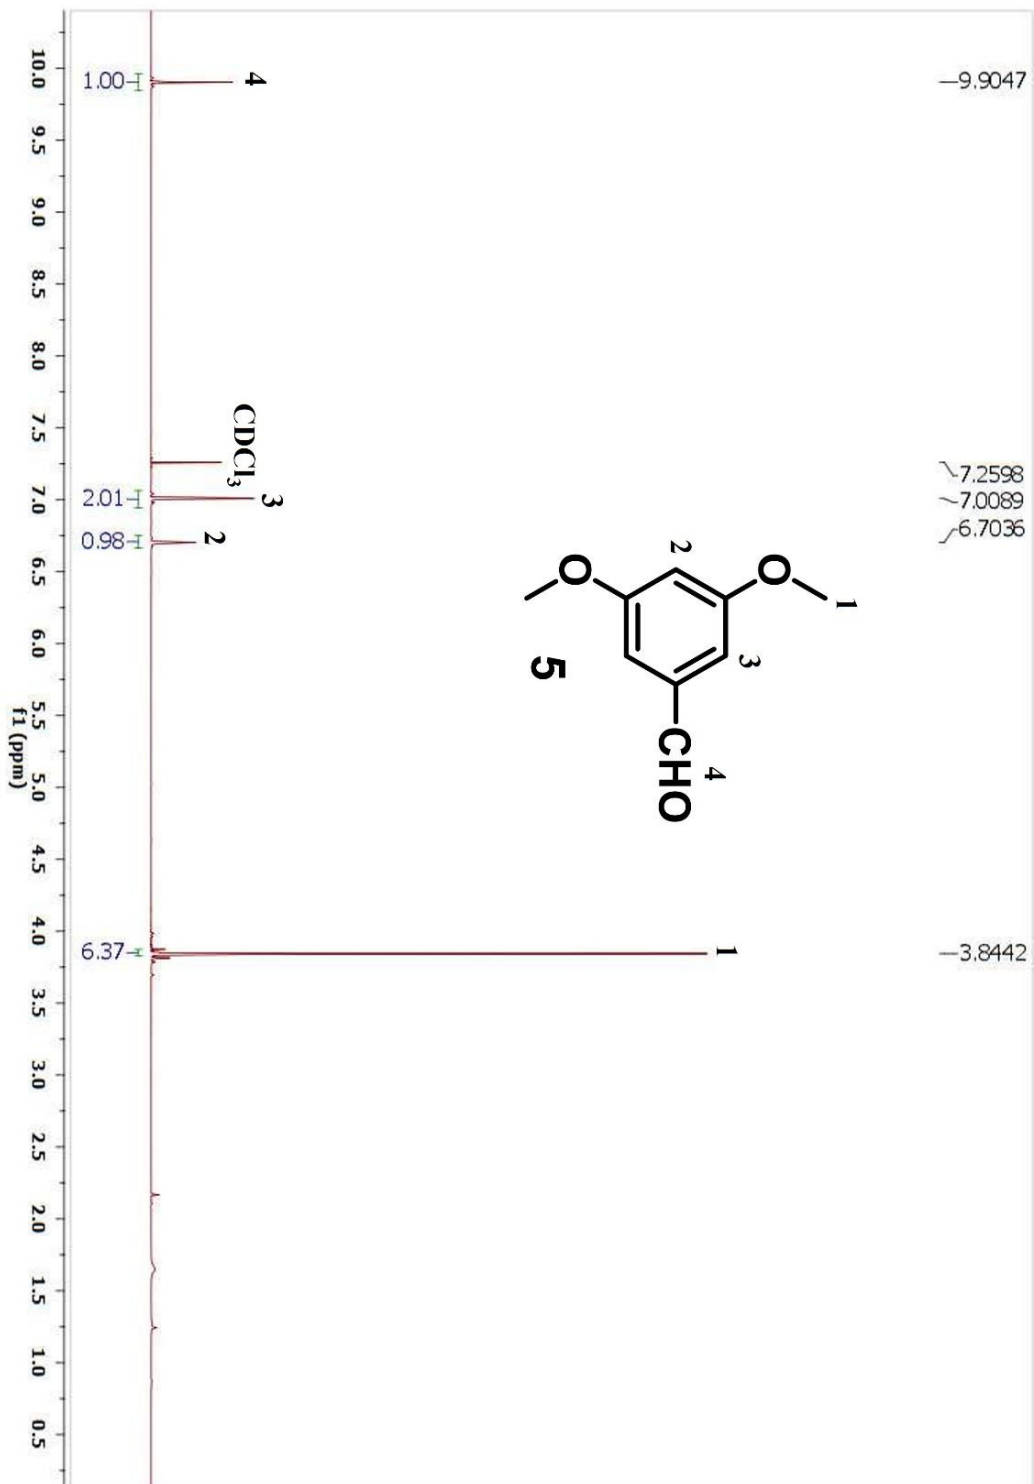

$^{13}\text{C}\{^1\text{H}\}$  NMR (100 MHz,  $\text{CDCl}_3$ , RT)

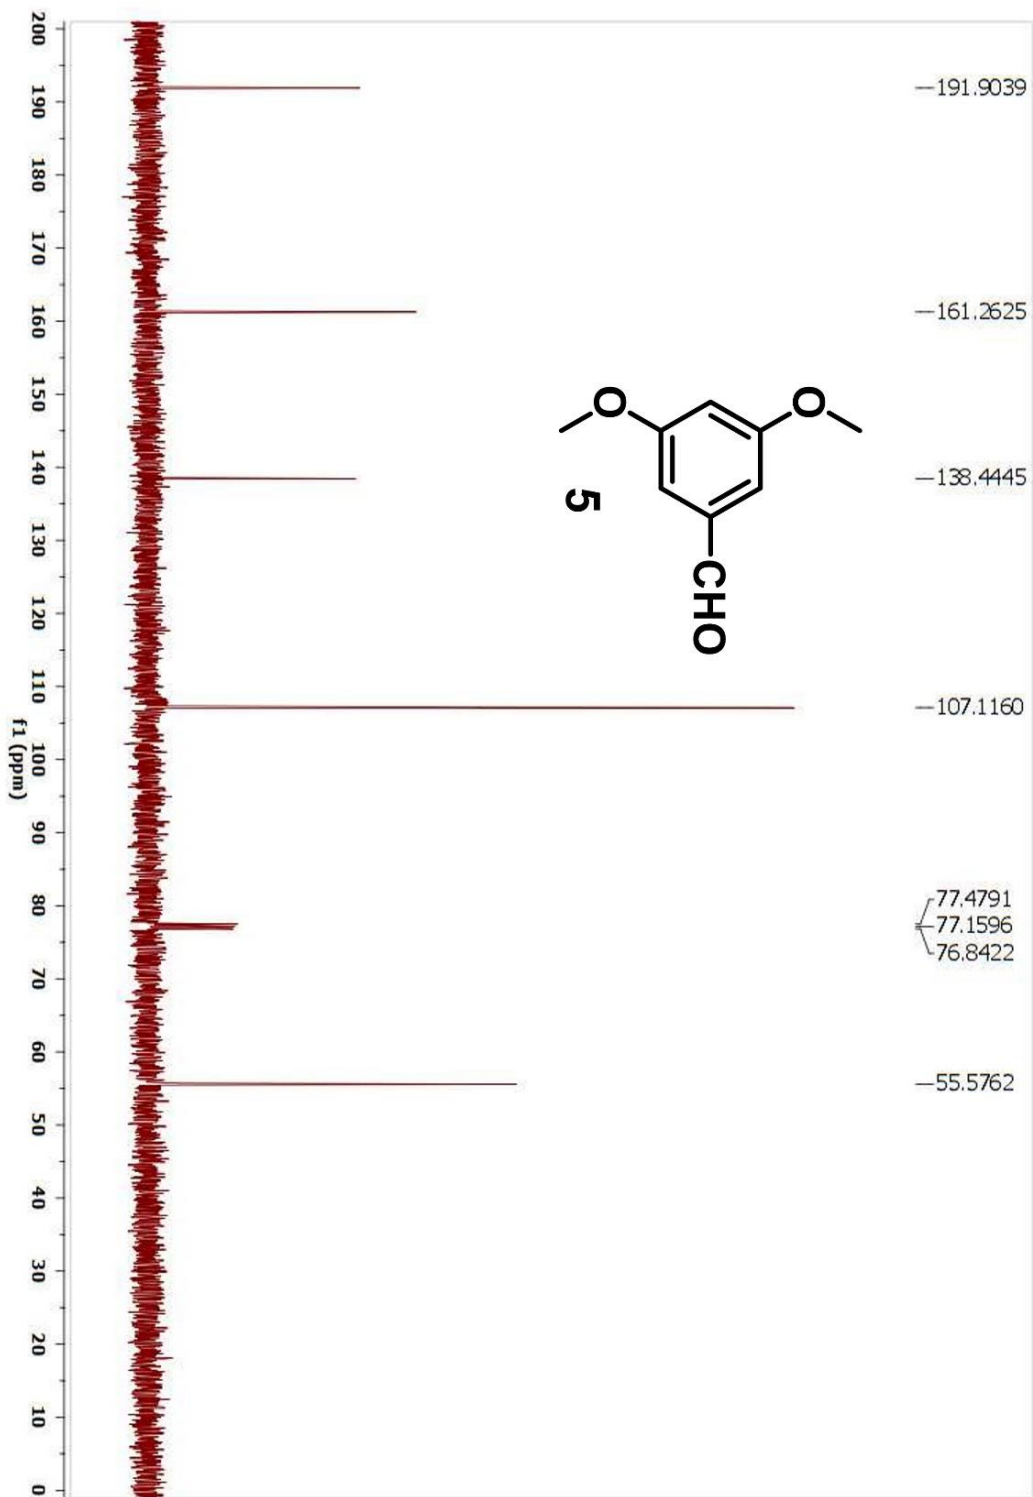



**<sup>1</sup>H NMR (500 MHz, CDCl<sub>3</sub>, RT)**

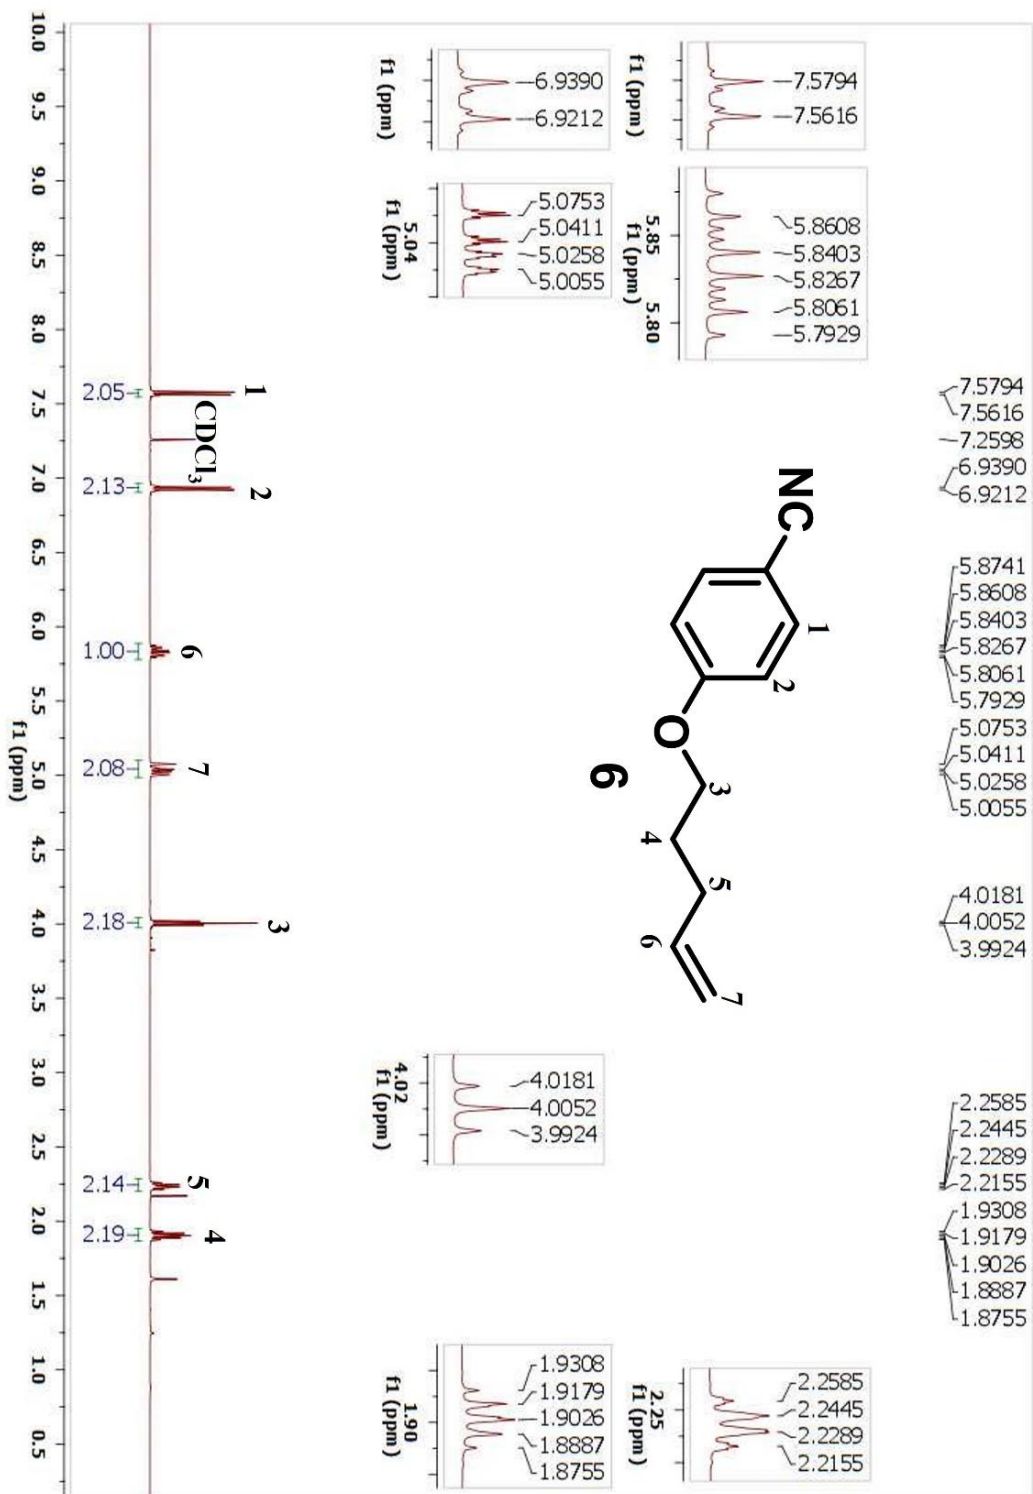

$^{13}\text{C}\{^1\text{H}\}$  NMR (100 MHz,  $\text{CDCl}_3$ , RT)

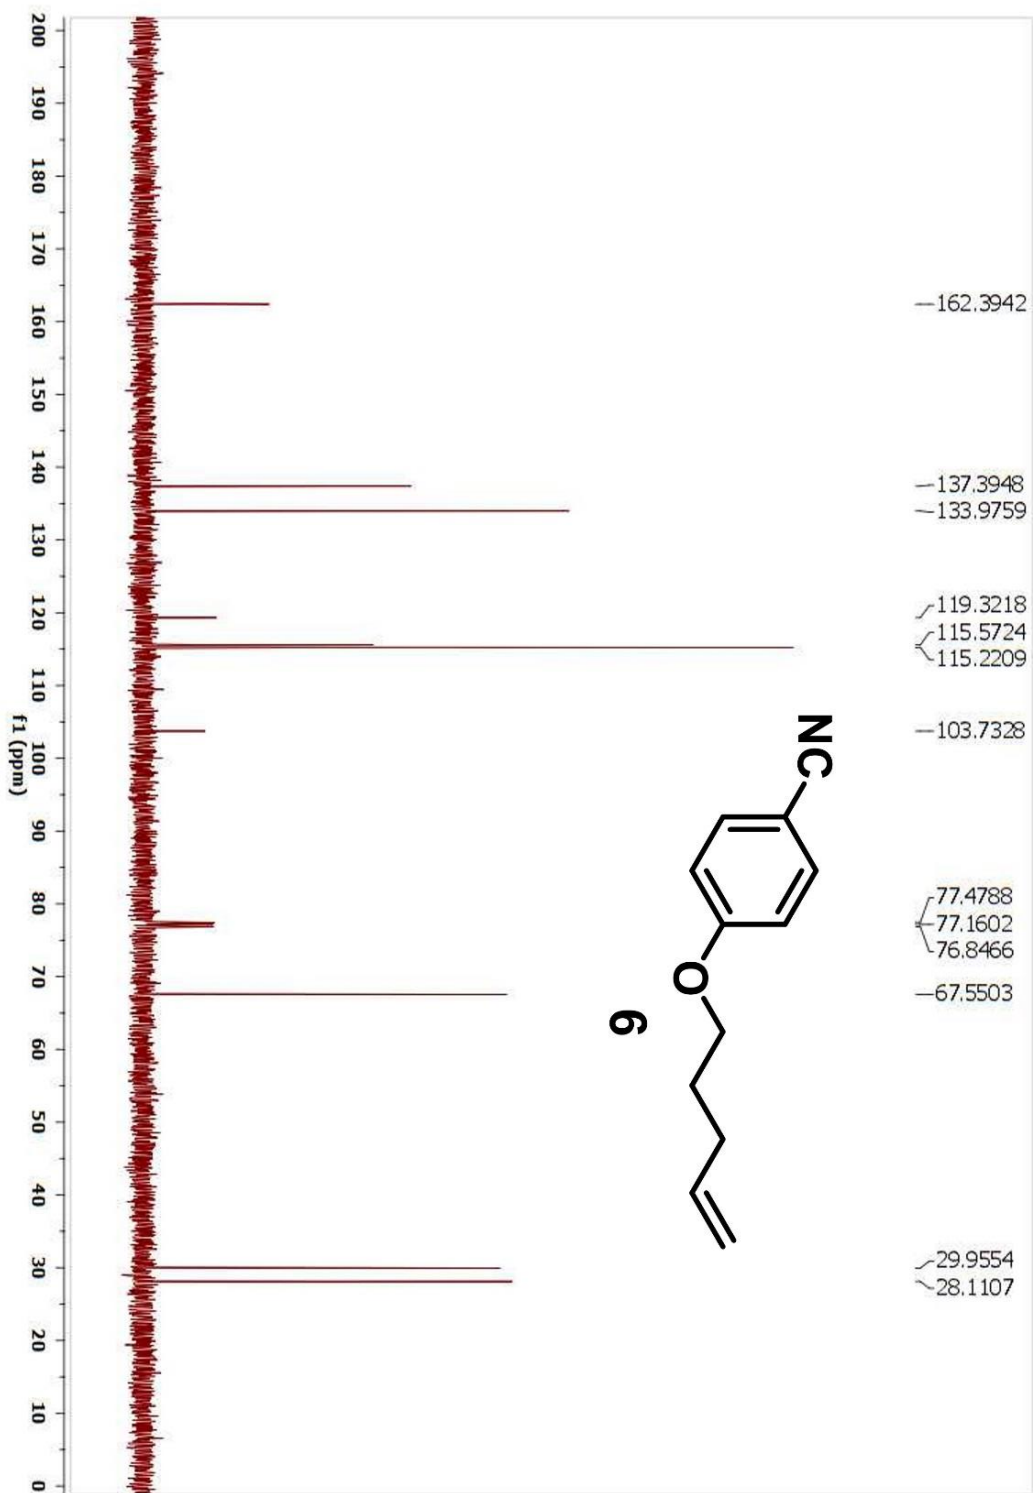

**<sup>1</sup>H NMR (400 MHz, CDCl<sub>3</sub>, RT)**

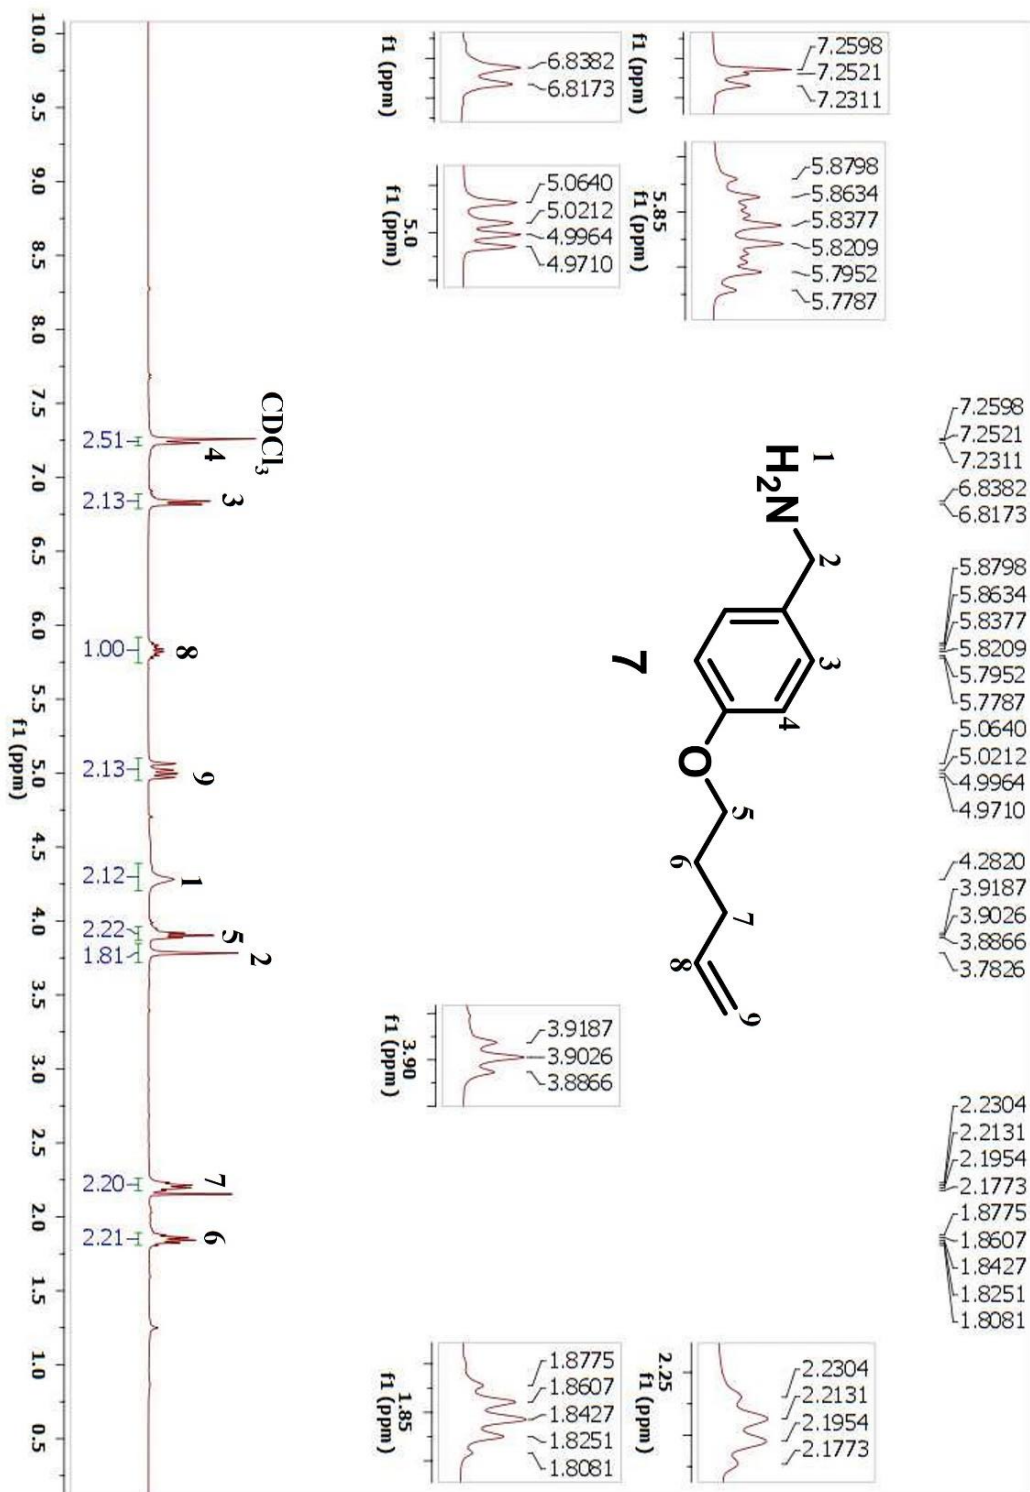

$^{13}\text{C}\{^1\text{H}\}$  NMR (100 MHz,  $\text{CDCl}_3$ , RT)

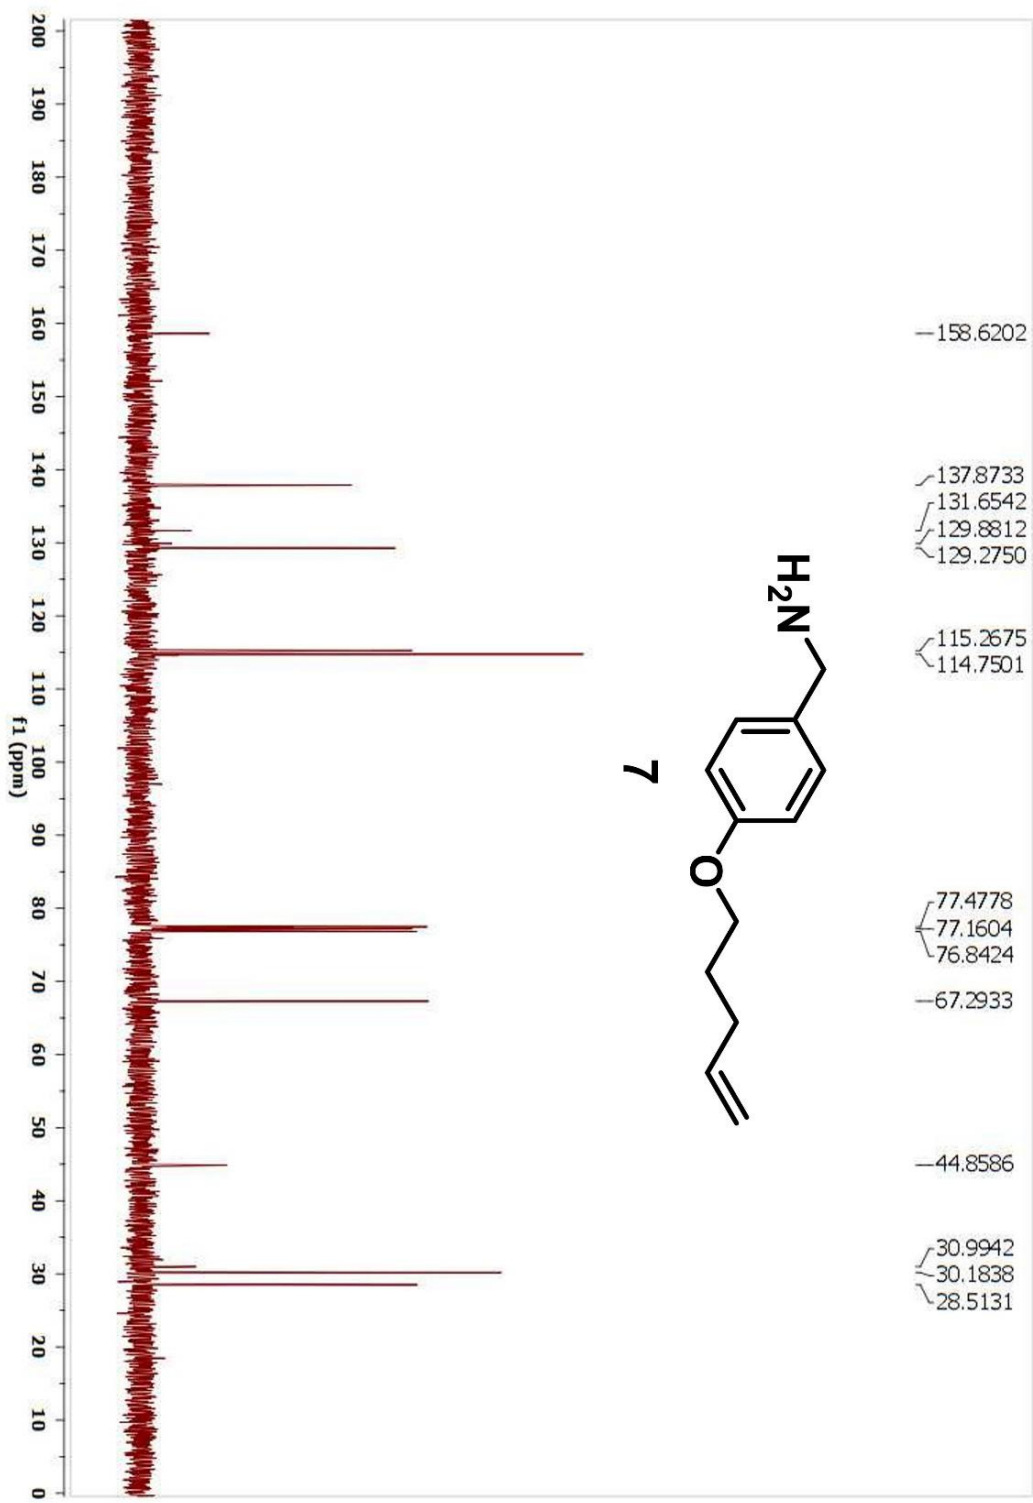

**<sup>1</sup>H NMR (400 MHz, CDCl<sub>3</sub>, RT)**

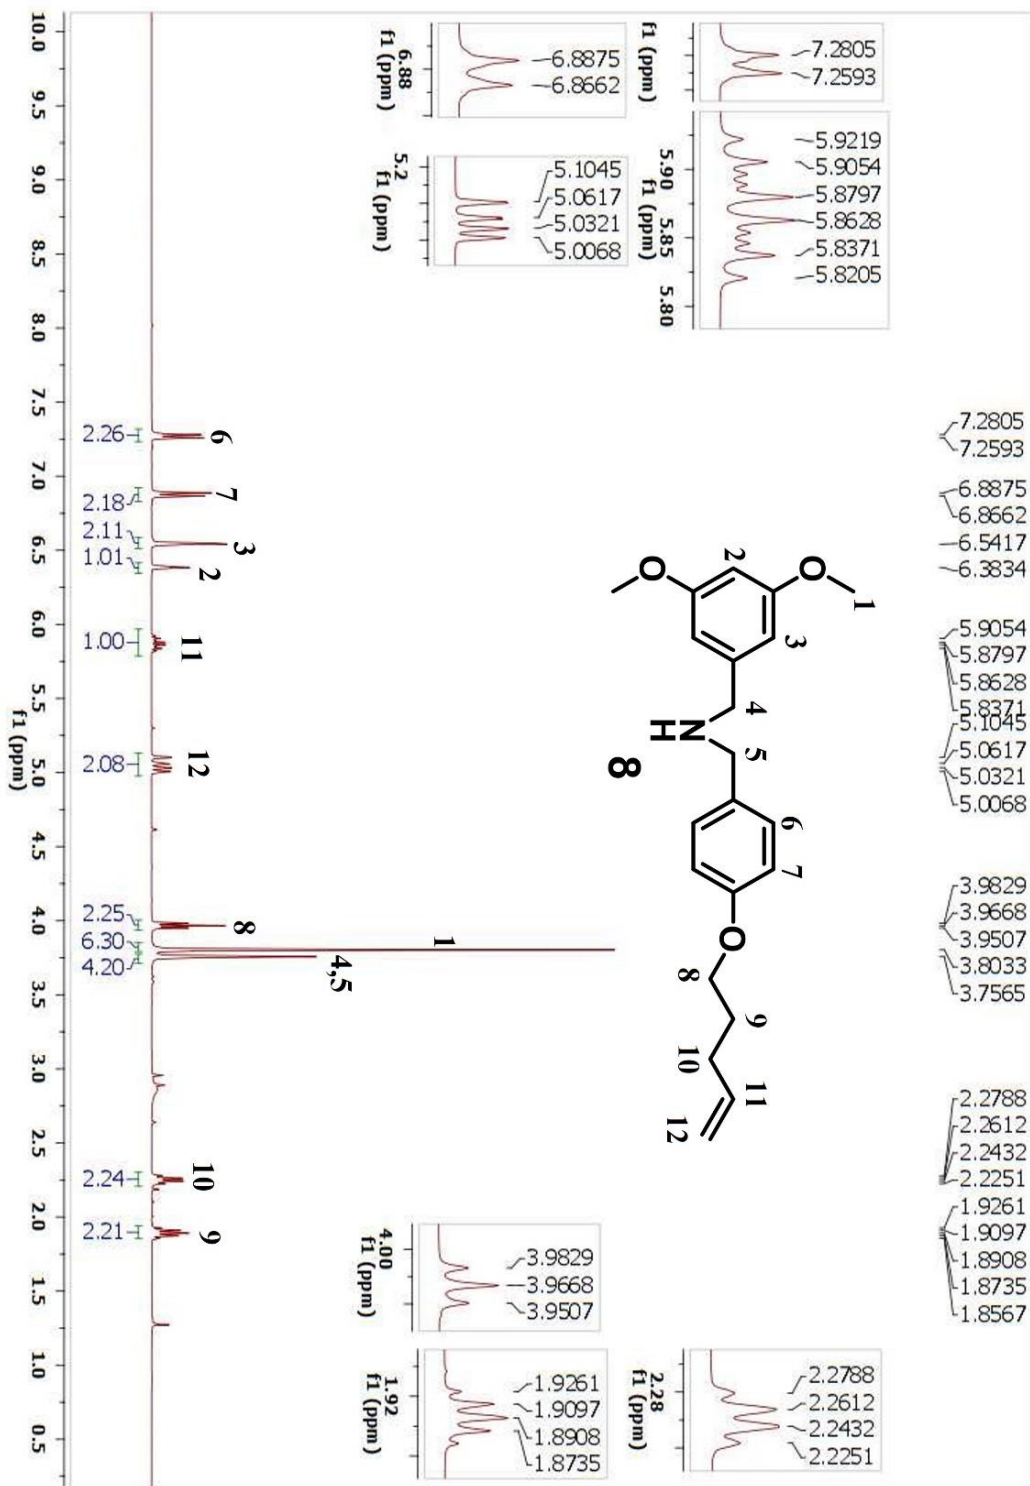

$^{13}\text{C}\{^1\text{H}\}$  NMR (100 MHz,  $\text{CDCl}_3$ , RT)

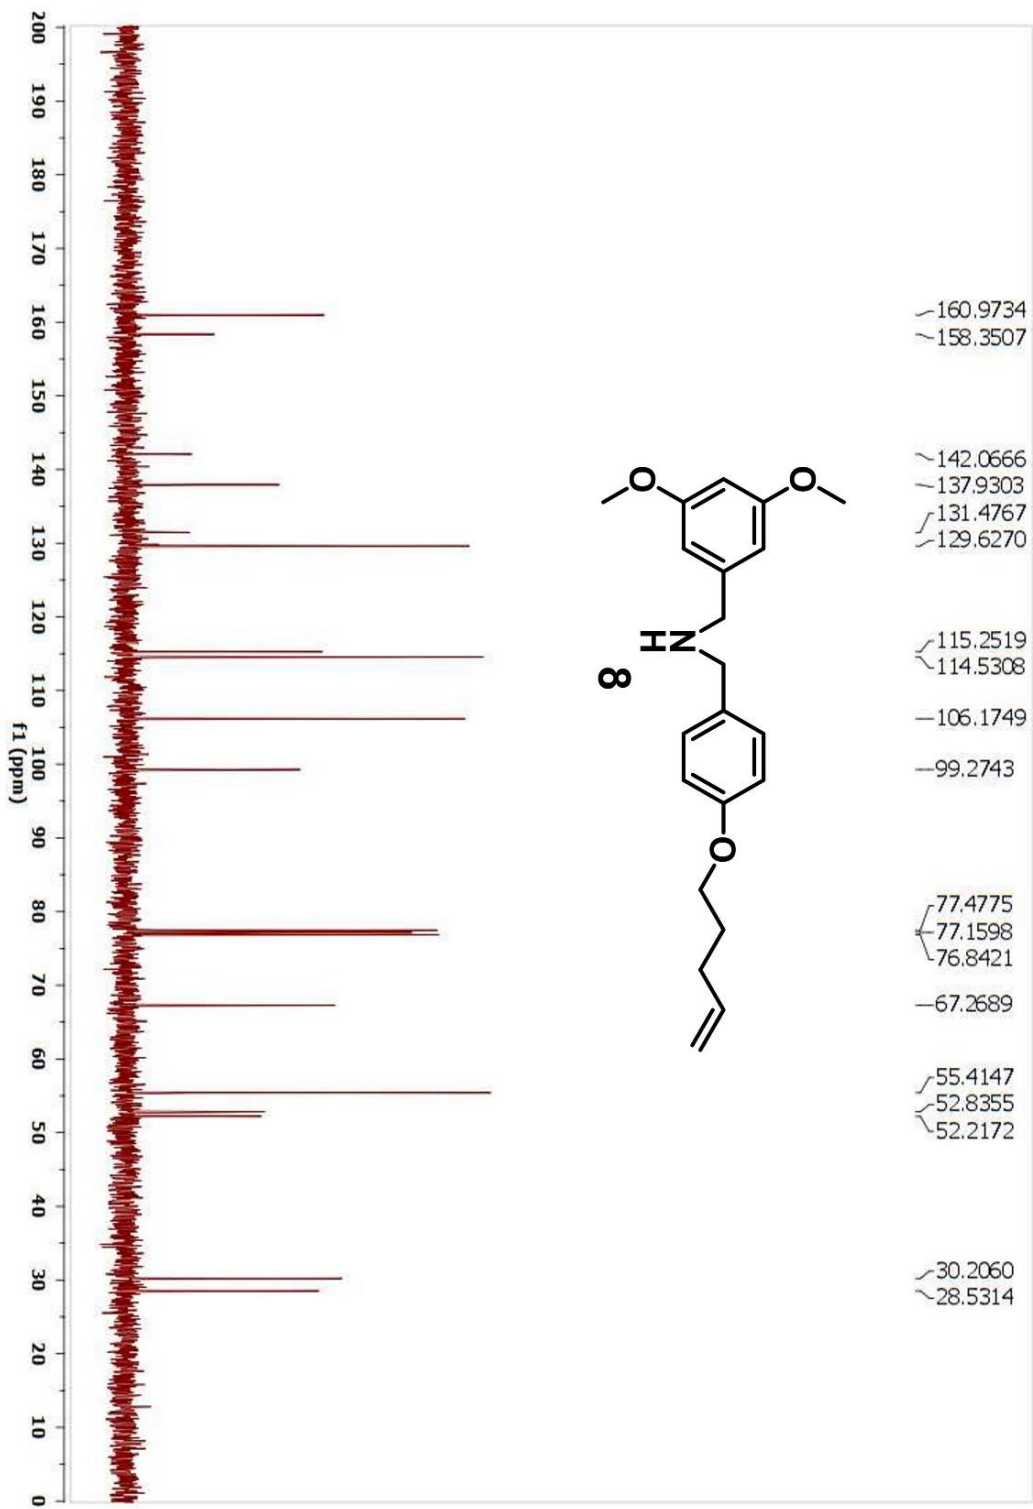

**<sup>1</sup>H NMR (400 MHz, CDCl<sub>3</sub>, RT)**

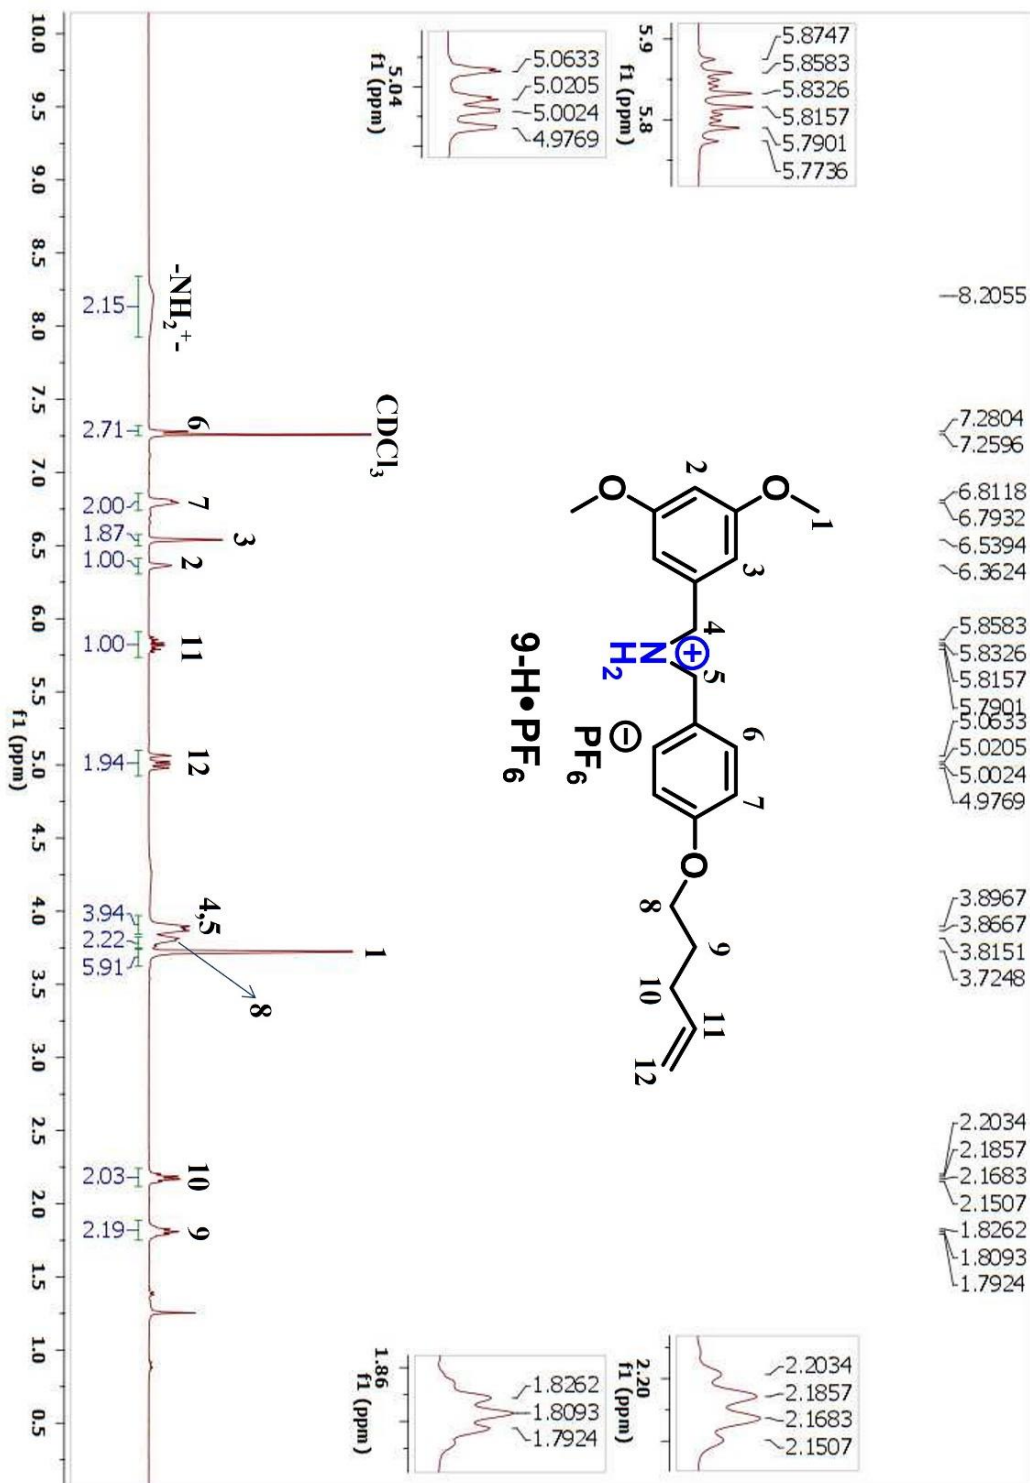

$^{13}\text{C}\{^1\text{H}\}$  NMR (100 MHz, DMSO- $d_6$ , RT)

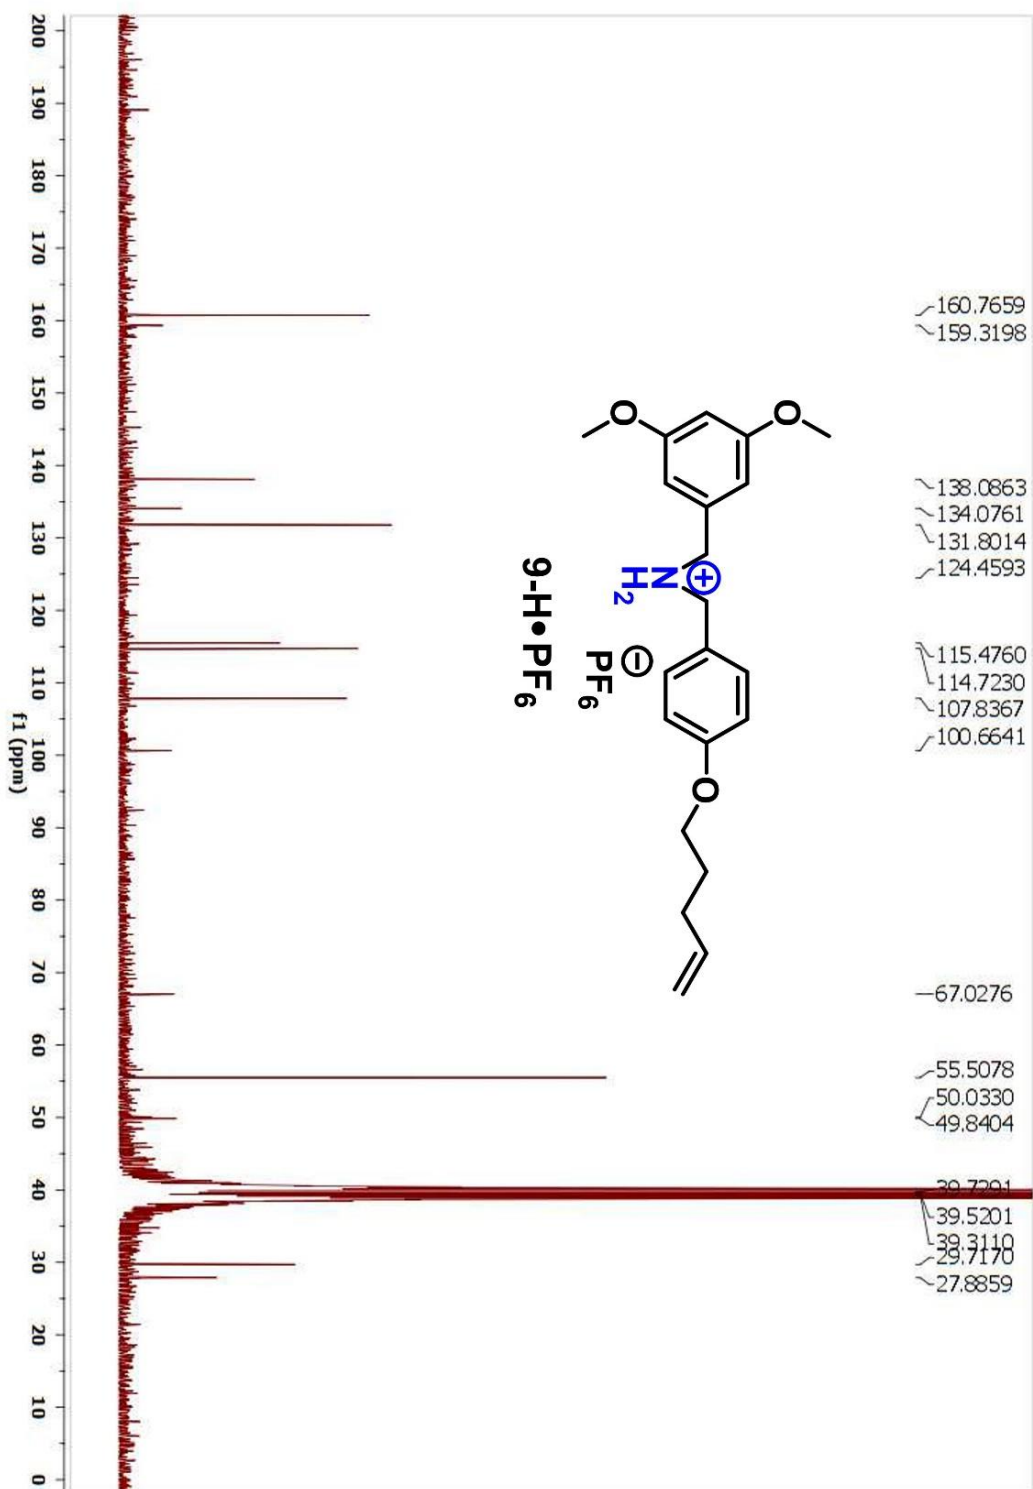



**<sup>1</sup>H NMR (400 MHz, CDCl<sub>3</sub>, RT)**

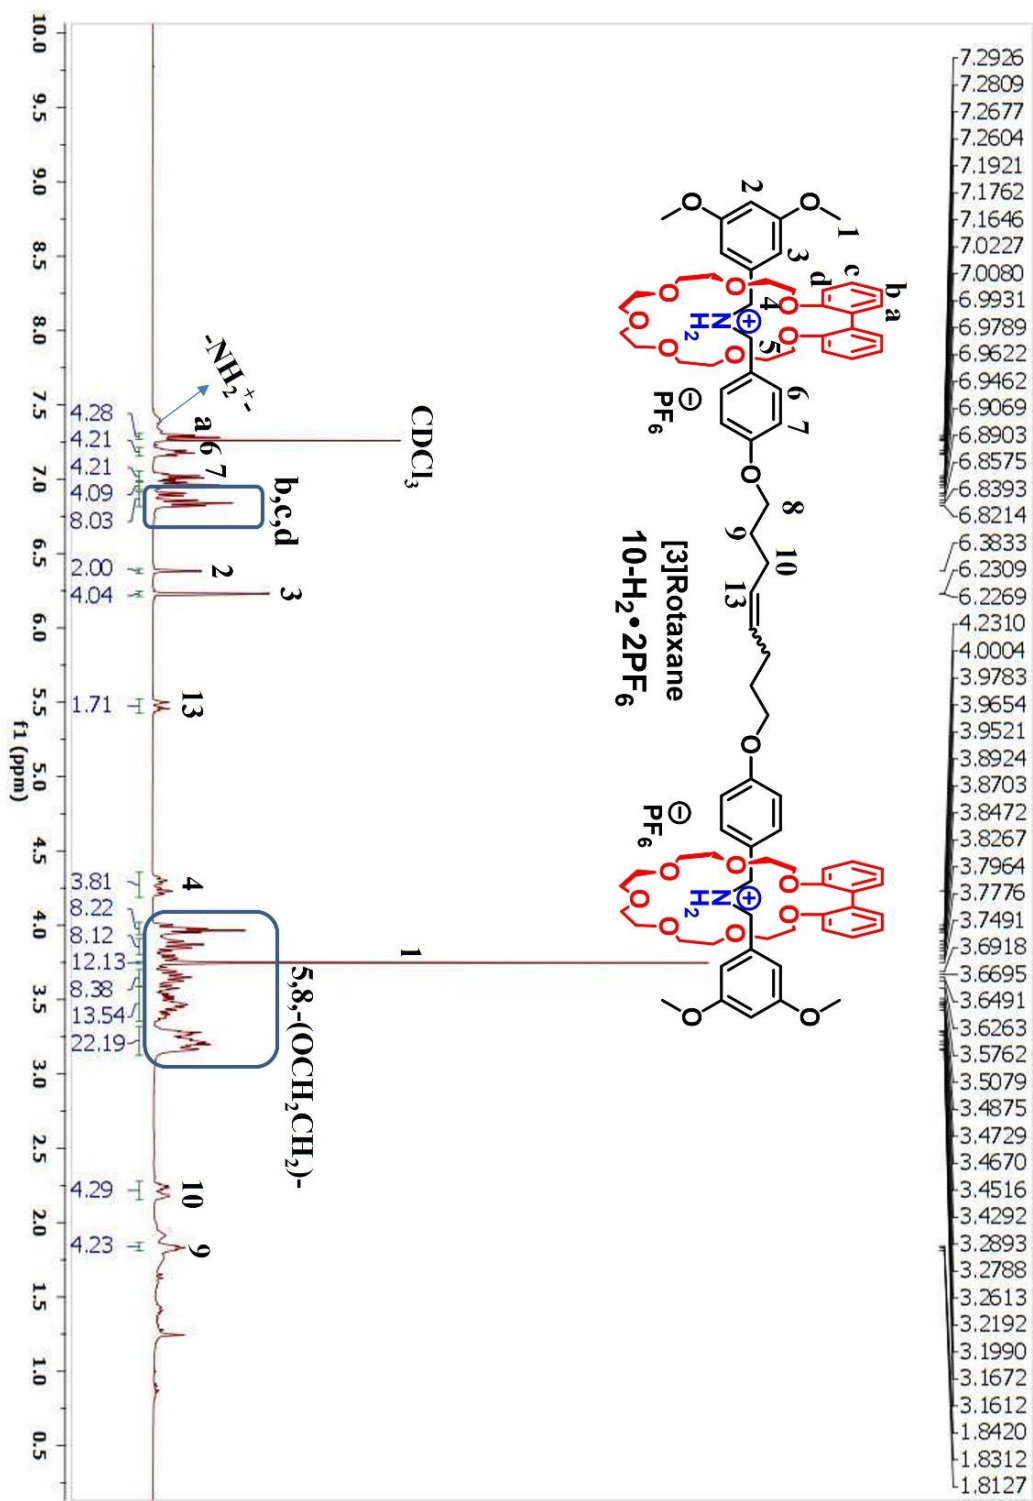

$^{13}\text{C}\{^1\text{H}\}$  NMR (125 MHz,  $\text{CDCl}_3$ , RT)

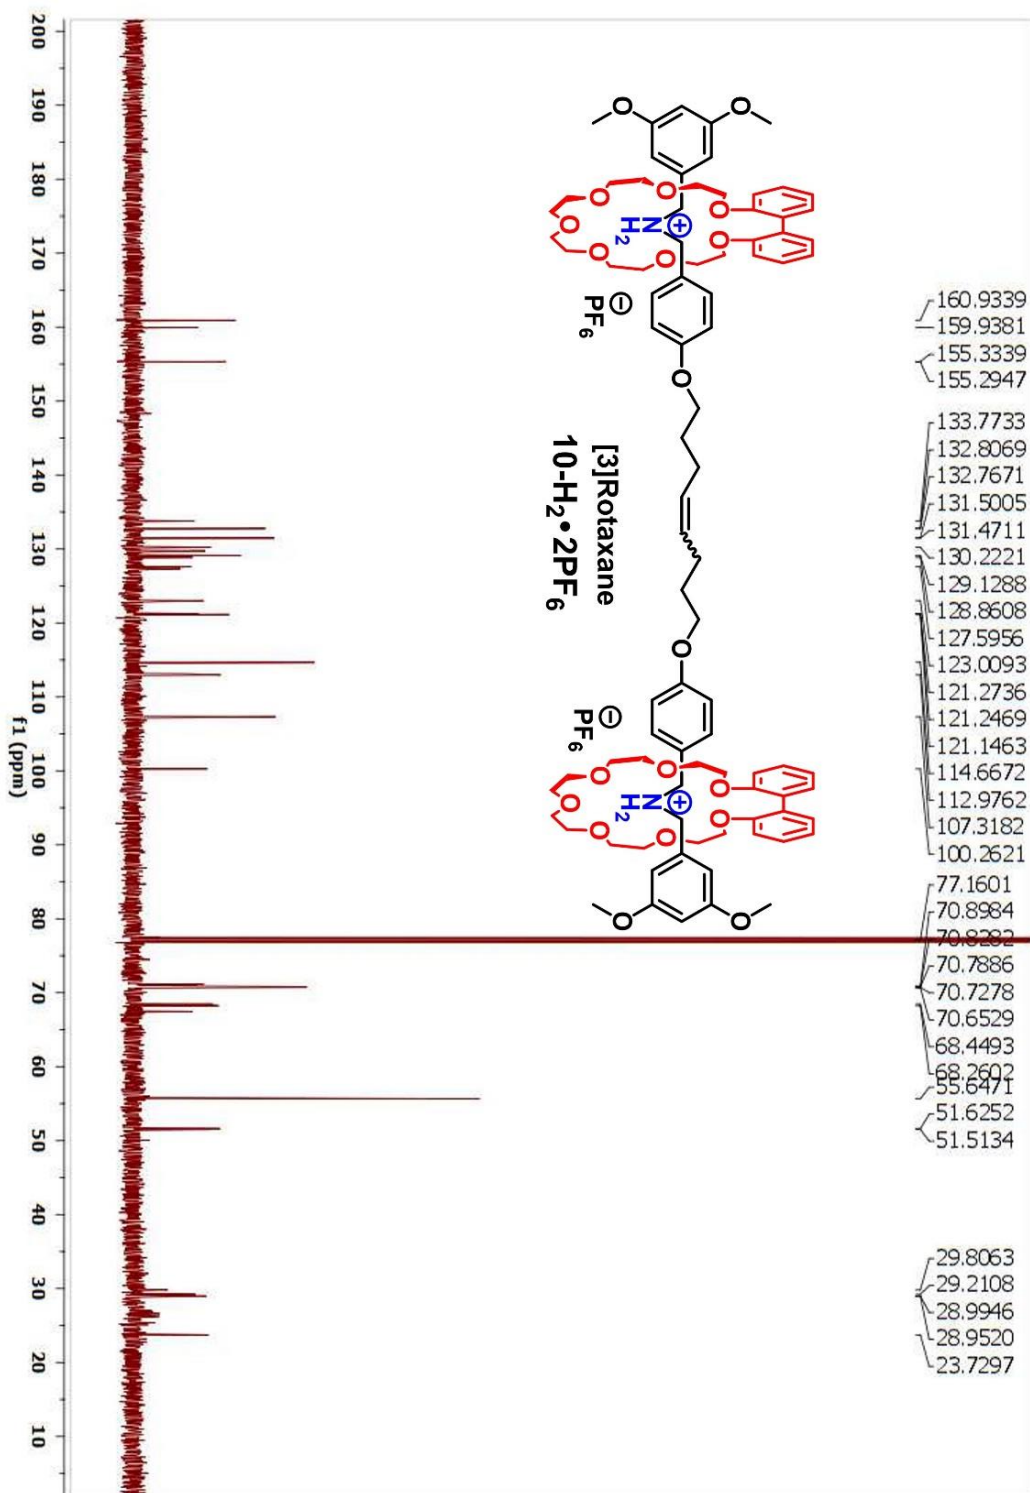

**<sup>1</sup>H NMR (400 MHz, CDCl<sub>3</sub>, RT)**

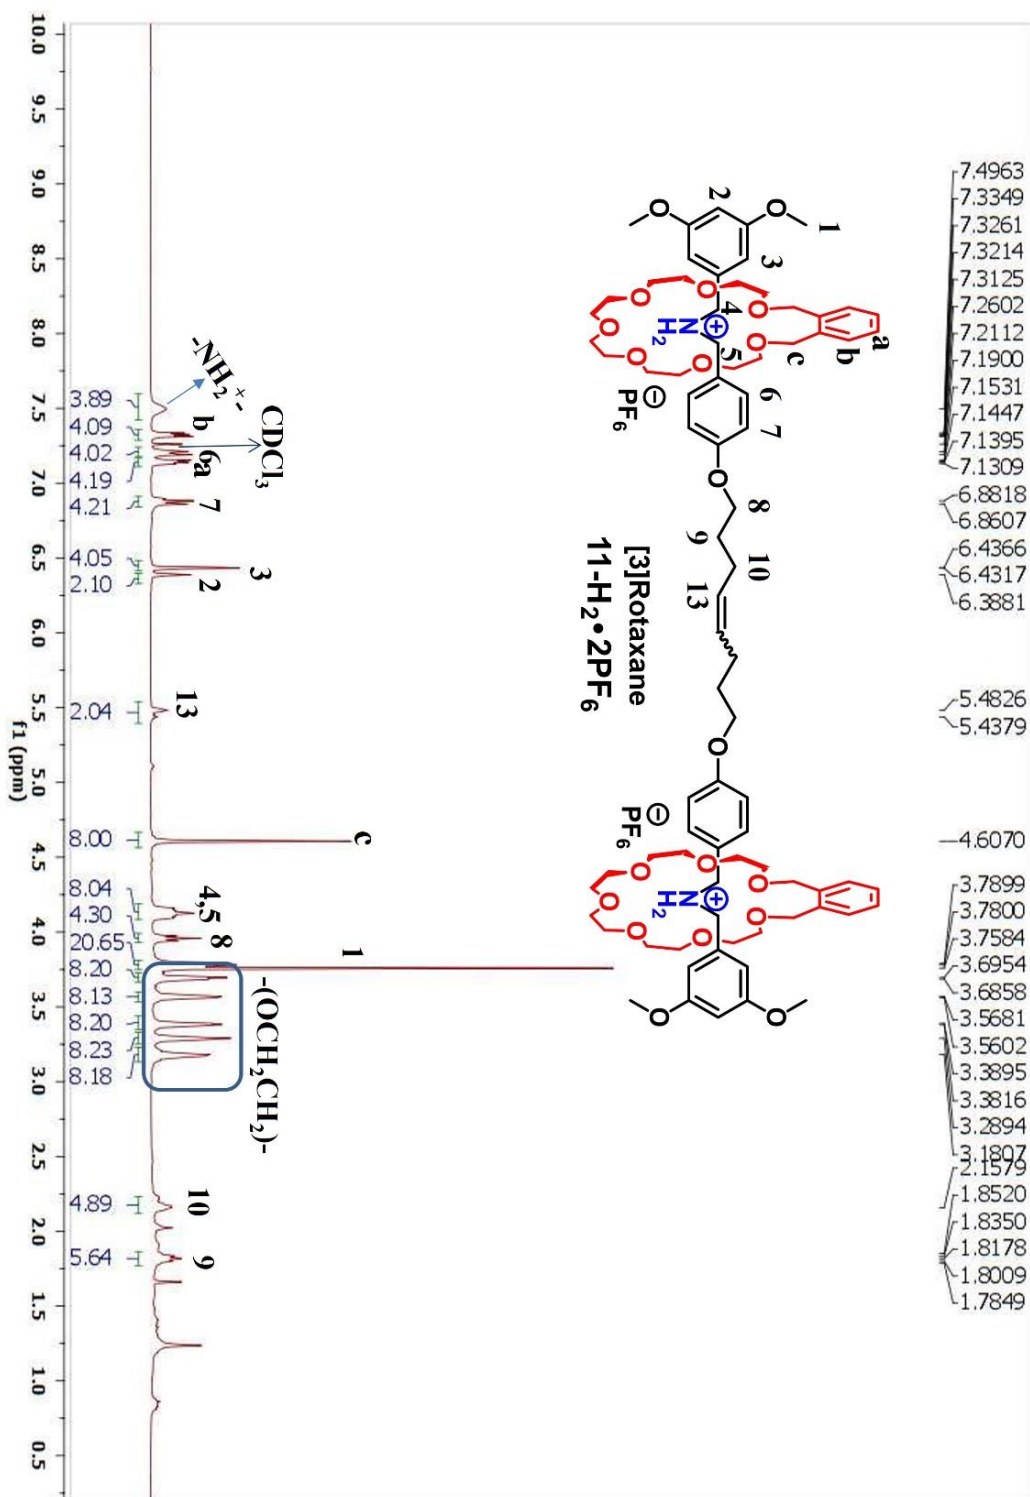

$^{13}\text{C}\{^1\text{H}\}$  NMR (125 MHz,  $\text{CDCl}_3$ , RT)

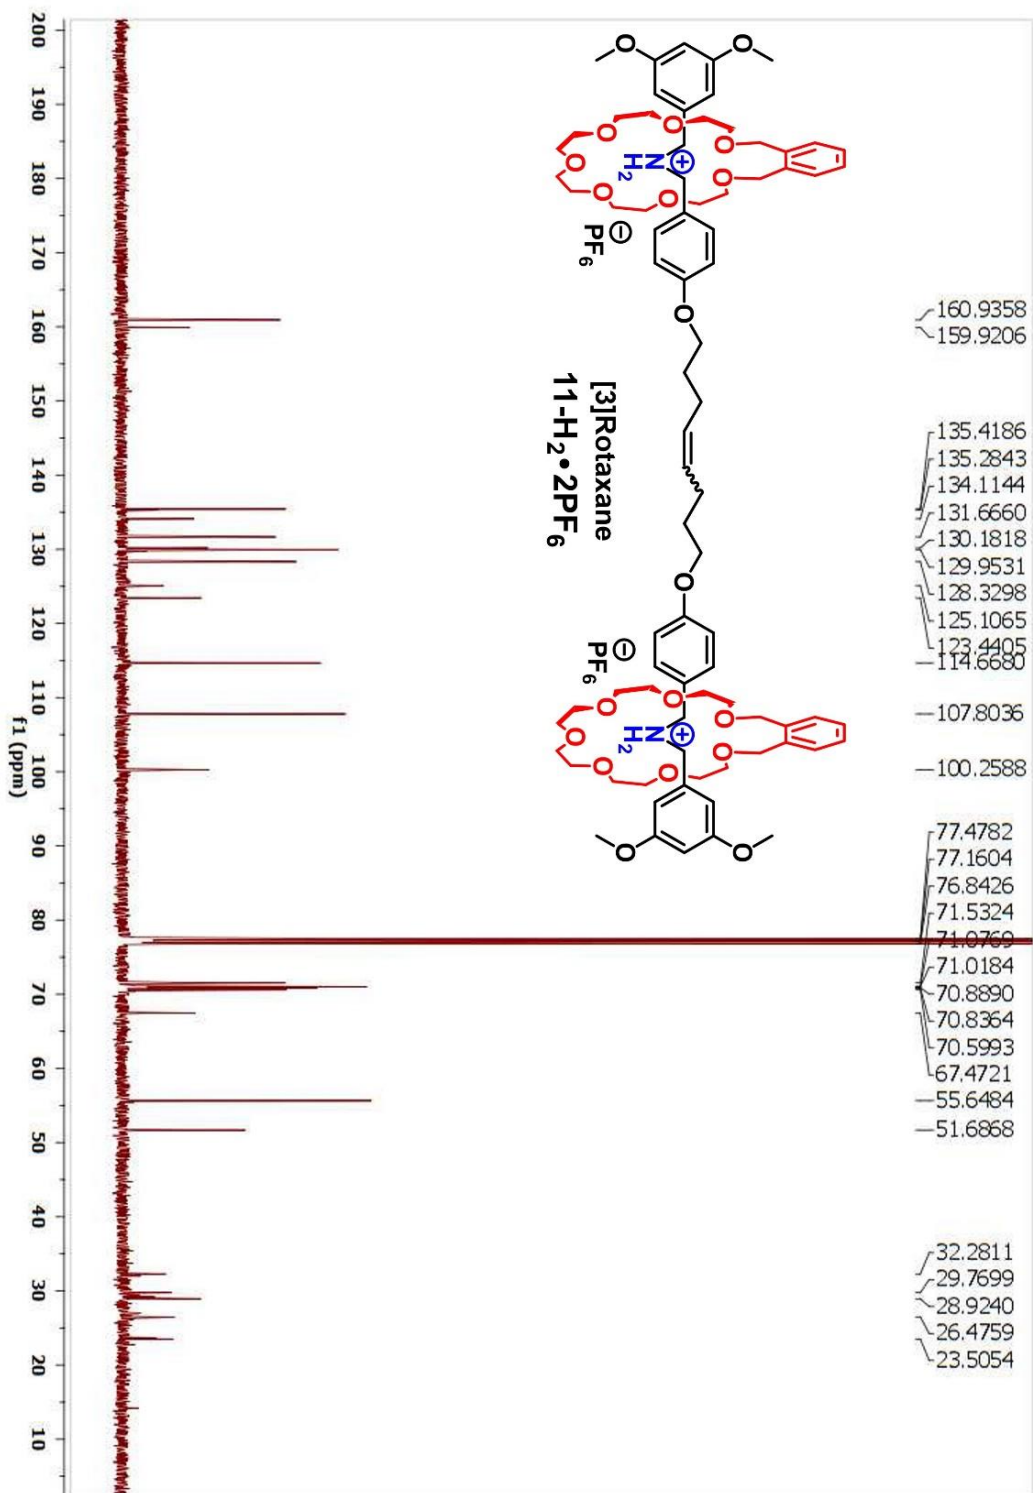

Supplement: d3ob02094k1.pdf [file d3ob02094k1.pdf]
